# Supplementary material
Source: Royal Society of Chemistry journal article supplement (doi:10.1039/d6ce00189k)
Supplement: d6ce00189k1.pdf [file d6ce00189k1.pdf]

### SUPPLEMENTARY FILE INFORMATION

**Table S1: Experimental and computed non-hydrogen atoms geometrical bond lengths of MK1**

| Atoms          | Bond Length (Å) |        | Atoms          | Bond Length (Å) |        |
|----------------|-----------------|--------|----------------|-----------------|--------|
|                | XRD             | DFT    |                | XRD             | DFT    |
| <b>C1-O1</b>   | 1.434(2)        | 1.4229 | <b>C5-C4</b>   | 1.398(2)        | 1.3967 |
| <b>C23-O1</b>  | 1.353(1)        | 1.3534 | <b>C6-C5</b>   | 1.406(2)        | 1.4100 |
| <b>C24-O2</b>  | 1.362(1)        | 1.3608 | <b>C13-C5</b>  | 1.487(2)        | 1.4869 |
| <b>C2-O2</b>   | 1.429(2)        | 1.4208 | <b>C19-C6</b>  | 1.510(2)        | 1.5206 |
| <b>C19-O3</b>  | 1.222(1)        | 1.2192 | <b>C8-C7</b>   | 1.395(2)        | 1.4028 |
| <b>C2-N4</b>   | 1.337(2)        | 1.3319 | <b>C12-C7</b>  | 1.397(2)        | 1.4027 |
| <b>C6-N4</b>   | 1.340(1)        | 1.3376 | <b>C9-C8</b>   | 1.386(2)        | 1.3923 |
| <b>C3-C2</b>   | 1.396(2)        | 1.4007 | <b>C10-C9</b>  | 1.384(2)        | 1.3939 |
| <b>C4-C3</b>   | 1.393(2)        | 1.3981 | <b>C11-C10</b> | 1.386(2)        | 1.3940 |
| <b>C7-C3</b>   | 1.484(2)        | 1.4825 | <b>C12-C11</b> | 1.387(2)        | 1.3920 |
| <b>C15-C14</b> | 1.388(2)        | 1.3923 | <b>C14-C13</b> | 1.390(2)        | 1.4008 |
| <b>C16-C15</b> | 1.381(2)        | 1.3937 | <b>C18-C13</b> | 1.397(2)        | 1.4006 |
| <b>C17-C16</b> | 1.381(2)        | 1.3937 | <b>C20-C19</b> | 1.479(2)        | 1.4860 |
| <b>C18-C17</b> | 1.385(2)        | 1.3920 | <b>C21-C20</b> | 1.389(2)        | 1.3945 |
| <b>C22-C21</b> | 1.393(2)        | 1.3916 | <b>C25-C20</b> | 1.410(2)        | 1.4084 |
| <b>C23-C22</b> | 1.383(2)        | 1.3954 |                |                 |        |
| <b>C24-C23</b> | 1.418(2)        | 1.4184 |                |                 |        |
| <b>C25-C24</b> | 1.375(2)        | 1.3867 |                |                 |        |

**Table S2: Experimental and computed non-hydrogen atoms geometrical bond angles of MK1**

| Atoms              | Bond Angle (°) |        | Atoms              | Bond Angle(°) |        |
|--------------------|----------------|--------|--------------------|---------------|--------|
|                    | XRD            | DFT    |                    | XRD           | DFT    |
| <b>C1-O1-C23</b>   | 116.9(1)       | 118.67 | <b>C15-C16-C17</b> | 119.6(1)      | 119.57 |
| <b>C24-O2-C26</b>  | 117.0(1)       | 118.21 | <b>C16-C17-C18</b> | 120.2(1)      | 120.24 |
| <b>C2-N4-C6</b>    | 117.9(1)       | 119.02 | <b>C13-C18-C17</b> | 120.6(1)      | 120.70 |
| <b>N4-C2-C3</b>    | 124.3(1)       | 123.70 | <b>O3-C19-C6</b>   | 119.1(1)      | 117.81 |
| <b>C2-C3-C4</b>    | 116.6(1)       | 116.47 | <b>O3-C19-C20</b>  | 122.3(1)      | 122.07 |
| <b>C2-C3-C7</b>    | 120.7(1)       | 121.48 | <b>C6-C19-C20</b>  | 118.56(9)     | 120.11 |
| <b>C4-C3-C7</b>    | 122.6(1)       | 122.05 | <b>C19-C20-C21</b> | 122.1(1)      | 118.29 |
| <b>C3-C4-C5</b>    | 120.9(1)       | 121.23 | <b>C19-C20-C25</b> | 118.2(1)      | 122.59 |
| <b>C4-C5-C6</b>    | 116.9(1)       | 116.79 | <b>C21-C20-C25</b> | 119.7(1)      | 119.08 |
| <b>C4-C5-C13</b>   | 120.3(1)       | 119.74 | <b>C20-C21-C22</b> | 120.2(1)      | 120.53 |
| <b>C6-C5-C13</b>   | 122.8(1)       | 123.44 | <b>C21-C22-C23</b> | 120.2(1)      | 120.57 |
| <b>N4-C6-C5</b>    | 123.4(1)       | 122.76 | <b>O1-C23-C22</b>  | 124.7(1)      | 124.83 |
| <b>N4-C6-C19</b>   | 114.82(9)      | 114.99 | <b>O1-C23-C24</b>  | 115.3(1)      | 115.80 |
| <b>C5-C6-C19</b>   | 121.74(9)      | 121.89 | <b>C22-C23-C24</b> | 120.0(1)      | 119.37 |
| <b>C3-C7-C8</b>    | 121.0(1)       | 120.96 | <b>O2-C24-C23</b>  | 114.7(1)      | 115.58 |
| <b>C3-C7-C12</b>   | 120.9(1)       | 120.72 | <b>O2-C24-C25</b>  | 125.7(1)      | 124.91 |
| <b>C7-C8-C9</b>    | 121.1(1)       | 120.82 | <b>C23-C24-C25</b> | 119.6(1)      | 119.51 |
| <b>C8-C9-C10</b>   | 120.1(1)       | 120.25 | <b>C20-C25-C24</b> | 120.3(1)      | 120.94 |
| <b>C9-C10-C11</b>  | 119.5(1)       | 119.53 |                    |               |        |
| <b>C10-C11-C12</b> | 120.5(1)       | 120.23 |                    |               |        |
| <b>C7-C12-C11</b>  | 120.6(1)       | 120.85 |                    |               |        |
| <b>C5-C13-C14</b>  | 120.5(1)       | 120.31 |                    |               |        |
| <b>C5-C13-C18</b>  | 120.7(1)       | 121.08 |                    |               |        |
| <b>C14-C13-C18</b> | 118.7(1)       | 118.29 |                    |               |        |
| <b>C13-C14-C15</b> | 120.3(1)       | 120.73 |                    |               |        |
| <b>C14-C15-C16</b> | 120.6(1)       | 120.19 |                    |               |        |

**Table S3: Experimental and computed non-hydrogen atoms geometrical torsion angles of MK1**

| Atoms           | Torsion Angles (°) |         | Atoms           | Torsion Angles (°) |         |
|-----------------|--------------------|---------|-----------------|--------------------|---------|
|                 | XRD                | DFT     |                 | XRD                | DFT     |
| C1-O1-C23-C22   | 1.0(2)             | -0.13   | C4-C5-C6-N4     | -1.0(2)            | 1.54    |
| C1-O1-C23-C24   | -178.0(1)          | 179.94  | C4-C5-C6-C19    | -177.3(1)          | -171.27 |
| C2-O2-C24-C23   | -176.0(1)          | 178.60  | C13-C5-C6-N4    | -178.5(1)          | -176.49 |
| C2-O2-C24-C25   | 5.1(2)             | -1.15   | C13-C5-C6-C19   | 5.2(2)             | 10.70   |
| C6-N4-C2-C3     | 0.3(2)             | 1.26    | C4-C5-C13-C14   | 53.6(2)            | 51.41   |
| C2-N4-C6-C5     | 1.3(2)             | -2.31   | C4-C5-C13-C18   | -123.5(1)          | -126.57 |
| C2-N4-C6-C19    | 177.8(1)           | 170.95  | C6-C5-C13-C14   | -129.1(1)          | -130.61 |
| N4-C2-C3-C4     | -2.1(2)            | 0.49    | C6-C5-C13-C18   | 53.9(2)            | 51.41   |
| N4-C2-C3-C7     | 175.2(1)           | 179.99  | N4-C6-C19-O3    | -120.3(1)          | -120.52 |
| C2-C3-C4-C5     | 2.3(2)             | -1.24   | N4-C6-C19-C20   | 58.3(1)            | 58.42   |
| C7-C3-C4-C5     | -175.0(1)          | 179.26  | C5-C6-C19-O3    | 56.3(2)            | 52.82   |
| C2-C3-C7-C8     | 28.9(2)            | -39.38  | C5-C6-C19-C20   | -125.1(1)          | -128.25 |
| C2-C3-C7-C12    | -150.1(1)          | 140.26  | C3-C7-C8-C9     | -178.1(1)          | 179.55  |
| C4-C3-C7-C8     | -154.0(1)          | 140.09  | C12-C7-C8-C9    | 0.9(2)             | -0.10   |
| C4-C3-C7-C12    | 27.0(2)            | -40.27  | C3-C7-C12-C11   | 179.4(1)           | -179.59 |
| C3-C4-C5-C6     | -0.8(2)            | 0.30    | C8-C7-C12-C11   | 0.4(2)             | 0.07    |
| C3-C4-C5-C13    | 176.6(1)           | 178.41  | C7-C8-C9-C10    | -1.5(2)            | 0.06    |
| C5-C13-C14-C15  | -177.5(1)          | -178.65 | C8-C9-C10-C11   | 0.9(2)             | 0.01    |
| C18-C13-C14-C15 | -0.4(2)            | -0.36   | C9-C10-C11-C12  | 0.3(2)             | -0.05   |
| C5-C13-C18-C17  | 177.2(1)           | 178.18  | C10-C11-C12-C7  | -1.0(2)            | 0.01    |
| C14-C13-C18-C17 | 0.1(2)             | 0.15    | C23-C24-C25-C20 | 0.7(2)             | 0.03    |
| C13-C14-C15-C16 | 0.6(2)             | 0.34    | C19-C20-C21-C22 | 178.0(1)           | -177.99 |
| C14-C15-C16-C17 | -0.5(2)            | -0.11   | C25-C20-C21-C22 | -0.8(2)            | -0.16   |
| C15-C16-C17-C18 | 0.1(2)             | -0.10   | C19-C20-C25-C24 | -178.2(1)          | 177.78  |
| C16-C17-C18-C13 | 0.0(2)             | 0.07    | C21-C20-C25-C24 | 0.7(2)             | 0.04    |
| O3-C19-C20-C21  | -178.3(1)          | 2.88    | C20-C21-C22-C23 | -0.5(2)            | 0.19    |
| O3-C19-C20-C25  | 0.5(2)             | -174.87 | C21-C22-C23-O1  | -177.2(1)          | 179.95  |
| C6-C19-C20-C21  | 3.1(2)             | -176.01 | C21-C22-C23-C24 | 1.8(2)             | -0.24   |
| C6-C19-C20-C25  | -178.0(1)          | 6.23    | O1-C23-C24-O2   | -1.8(1)            | 0.17    |
| O1-C23-C24-C25  | 177.2(1)           | 179.94  |                 |                    |         |
| C22-C23-C24-O2  | 179.1(1)           | 0.17    |                 |                    |         |
| C22-C23-C24-C25 | -1.9(2)            | 0.00    |                 |                    |         |
| O2-C24-C25-C20  | 179.5(1)           | 179.77  |                 |                    |         |

**Table S4: Experimental and computed non-hydrogen atoms geometrical bond lengths of MK2**

| Atoms          | Bond Length (Å) |        | Atoms          | Bond Length (Å) |        |
|----------------|-----------------|--------|----------------|-----------------|--------|
|                | XRD             | DFT    |                | XRD             | DFT    |
| <b>C24-C11</b> | 1.737(1)        | 1.7597 | <b>C14-C13</b> | 1.396(1)        | 1.4003 |
| <b>C22-C12</b> | 1.735(1)        | 1.7540 | <b>C18-C13</b> | 1.395(2)        | 1.4004 |
| <b>C1-O1</b>   | 1.213(1)        | 1.2143 | <b>C10-C9</b>  | 1.393(2)        | 1.3938 |
| <b>C2-N1</b>   | 1.337(2)        | 1.3280 | <b>C16-C15</b> | 1.388(2)        | 1.3934 |
| <b>C6-N1</b>   | 1.343(1)        | 1.3380 | <b>C17-C16</b> | 1.389(2)        | 1.3941 |
| <b>C6-C1</b>   | 1.499(2)        | 1.5081 | <b>C18-C17</b> | 1.391(2)        | 1.3916 |
| <b>C19-C1</b>  | 1.503(2)        | 1.5068 | <b>C20-C19</b> | 1.395(2)        | 1.4010 |
| <b>C11-C10</b> | 1.387(1)        | 1.3942 | <b>C24-C19</b> | 1.396(2)        | 1.3987 |
| <b>C3-C2</b>   | 1.397(2)        | 1.4030 | <b>C21-C20</b> | 1.386(2)        | 1.3878 |
| <b>C4-C3</b>   | 1.393(2)        | 1.3977 | <b>C22-C21</b> | 1.384(2)        | 1.3951 |
| <b>C7-C3</b>   | 1.482(2)        | 1.4816 | <b>C23-C22</b> | 1.393(2)        | 1.3897 |
| <b>C12-C11</b> | 1.391(2)        | 1.3919 | <b>C24-C23</b> | 1.385(2)        | 1.3917 |
| <b>C5-C4</b>   | 1.390(2)        | 1.3974 |                |                 |        |
| <b>C6-C5</b>   | 1.405(2)        | 1.4095 |                |                 |        |
| <b>C13-C5</b>  | 1.488(1)        | 1.4874 |                |                 |        |
| <b>C8-C7</b>   | 1.401(1)        | 1.4029 |                |                 |        |
| <b>C12-C7</b>  | 1.397(2)        | 1.4028 |                |                 |        |
| <b>C15-C14</b> | 1.395(2)        | 1.3927 |                |                 |        |
| <b>C9-C8</b>   | 1.392(2)        | 1.3922 |                |                 |        |

**Table S5: Experimental and computed non-hydrogen atoms geometrical bond angles of MK2**

| Atoms       | Bond Angle (°) |        | Atoms       | Bond Angle(°) |        |
|-------------|----------------|--------|-------------|---------------|--------|
|             | XRD            | DFT    |             | XRD           | DFT    |
| C2—N1—C6    | 117.69 (10)    | 119.13 | C24—C19—C1  | 124.41 (10)   | 125.82 |
| C18—C13—C14 | 119.43 (10)    | 118.76 | C8—C7—C3    | 121.37 (10)   | 120.80 |
| O1—C1—C6    | 120.42 (11)    | 120.89 | C21—C20—C19 | 121.55 (11)   | 121.99 |
| C18—C13—C5  | 119.71 (10)    | 120.99 | C9—C8—C7    | 120.30 (11)   | 120.74 |
| O1—C1—C19   | 119.84 (10)    | 119.77 | C24—C19—C1  | 124.41 (10)   | 125.82 |
| C14—C13—C5  | 120.81 (10)    | 120.19 | C8—C7—C3    | 121.37 (10)   | 120.80 |
| C6—C1—C19   | 119.36 (10)    | 119.01 | C21—C20—C19 | 121.55 (11)   | 121.99 |
| C15—C14—C13 | 120.26 (11)    | 120.64 | C9—C8—C7    | 120.30 (11)   | 120.74 |
| N1—C2—C3    | 123.66 (10)    | 123.44 | C22—C21—C20 | 118.82 (11)   | 118.59 |
| C16—C15—C14 | 119.85 (11)    | 120.14 | C8—C9—C10   | 120.34 (11)   | 120.25 |
| C4—C3—C2    | 117.25 (10)    | 116.59 | C21—C22—C23 | 121.46 (11)   | 121.32 |
| C4—C3—C7    | 121.90 (10)    | 122.01 | C11—C10—C9  | 119.74 (11)   | 119.58 |
| C2—C3—C7    | 120.80 (10)    | 121.39 | C21—C22—C12 | 119.93 (9)    | 119.68 |
| C15—C16—C17 | 120.17 (11)    | 119.63 | C23—C22—C12 | 118.59 (9)    | 119    |
| C5—C4—C3    | 120.83 (10)    | 121.34 | C24—C23—C22 | 118.40 (11)   | 118.83 |
| C16—C17—C18 | 120.08 (11)    | 120.25 | C10—C11—C12 | 120.03 (11)   | 120.21 |
| C4—C5—C6    | 116.72 (10)    | 116.43 | C23—C24—C19 | 121.81 (11)   | 121.67 |
| C4—C5—C13   | 120.37 (10)    | 119.34 | C11—C12—C7  | 120.87 (10)   | 120.79 |
| C6—C5—C13   | 122.85 (10)    | 124.17 | C23—C24—C11 | 117.23 (9)    | 116.64 |
| C17—C18—C13 | 120.21 (11)    | 120.57 | C19—C24—C11 | 120.91 (9)    | 121.61 |
| N1—C6—C5    | 123.72 (10)    | 123.04 |             |               |        |
| N1—C6—C1    | 113.73 (9)     | 113.57 |             |               |        |
| C5—C6—C1    | 122.09 (10)    | 123.06 |             |               |        |
| C20—C19—C24 | 117.94 (11)    | 117.55 |             |               |        |
| C12—C7—C8   | 118.69 (10)    | 118.43 |             |               |        |
| C20—C19—C1  | 117.61 (10)    | 116.59 |             |               |        |
| C12—C7—C3   | 119.92 (10)    | 120.77 |             |               |        |

**Table S6: Experimental and computed non-hydrogen atoms geometrical torsion angles of MK2**

| Atoms           | Torsion Angles (°) |         | Atoms           | Torsion Angles (°) |         |
|-----------------|--------------------|---------|-----------------|--------------------|---------|
|                 | XRD                | DFT     |                 | XRD                | DFT     |
| C6-N1-C2-C3     | 0.1(2)             | 0.93    | N1-C2 C3-C4     | -2.4(2)            | 0.19    |
| C2-N1-C6-C1     | -169.2(1)          | 171.96  | N1-C2-C3 C7     | 175.2(1)           | 179.42  |
| C2-N1-C6-C5     | 3.2(2)             | -1.60   | C2-C3-C4-C5     | 1.5(2)             | -0.67   |
| O1-C1-C6-N1     | 139.5(1)           | -137.49 | C7-C3-C4-C5     | -176.0(1)          | -179.90 |
| O1-C1-C6-C5     | -33.0(2)           | 36.07   | C2-C3-C7-C8     | 40.3(2)            | -39.75  |
| C19-C1-C6-N1    | -33.4(1)           | 35.88   | C2-C3-C7-C12    | -138.3(1)          | 140.19  |
| C19-C1-C6-C5    | 154.0(1)           | -150.55 | C4-C3-C7-C8     | -142.3(1)          | 139.44  |
| O1-C1-C19-C20   | -43.5(2)           | 38.96   | C4-C3-C7-C12    | 39.1(2)            | -40.62  |
| O1-C1-C19-C24   | 134.5(1)           | -138.51 | C3-C4-C5-C6     | 1.4(2)             | 0.08    |
| C6-C1-C19-C20   | 129.5(1)           | -134.50 | C3-C4-C5-C13    | -175.9(1)          | 177.47  |
| C6-C1-C19-C24   | -52.6(2)           | 48.04   | C7-C8-C9-C10    | 1.3(2)             | -0.08   |
| C4-C5-C6-N1     | -3.9(2)            | 1.10    | C8-C9-C10-C11   | -1.3(2)            | 0.06    |
| C4-C5-C6-C1     | 167.9(1)           | -171.86 | C9-C10-C11-C12  | -0.2(2)            | 0.01    |
| C13-C5-C6-N1    | 173.3(1)           | -173.15 | C10-C11-C12-C7  | 1.7(2)             | -0.06   |
| C13-C5-C6-C1    | -14.9(2)           | 10.89   | C5-C13-C14-C15  | 177.8(1)           | -177.98 |
| C4-C5-C13-C14   | -61.5(2)           | 54.22   | C18-C13-C14-C15 | 0.5(2)             | -0.62   |
| C4-C5-C3-C18    | 115.7(1)           | -123.08 | C5-C13-C18-C17  | -177.4(1)          | 177.62  |
| C6-C5-C13-C14   | 121.3(1)           | -128.61 | C14-C13-C18-C17 | -0.1(2)            | 0.28    |
| C6-C5-C13-C18   | -61.4(2)           | 54.09   | C13-C14-C15-C16 | -0.8(2)            | 0.51    |
| C3-C7-C8-C9     | -178.4(1)          | 179.97  | C14-C15-C16-C17 | 0.5(2)             | -0.07   |
| C12-C7-C8-C9    | 0.2(2)             | 0.03    | C15-C16-C17-C18 | -0.1(2)            | -0.27   |
| C3-C7-C12-C11   | 176.9(1)           | -179.89 | C16-C17-C18-C13 | -0.1(2)            | 0.15    |
| C8-C7-C12-C11   | -1.7(2)            | 0.04    | C1-C19-C20-C21  | 179.2(1)           | -179.94 |
| C24-C19-C20-C21 | 1.1(2)             | -2.26   |                 |                    |         |
| C1-C19-C24 C11  | -0.6(2)            | 178.84  |                 |                    |         |
| C1-C19-C24-C23  | -178.0(1)          | 2.11    |                 |                    |         |
| C20-C19-C24-C11 | 177.36(9)          | -175.34 |                 |                    |         |
| C22-C23-C24-C11 | -178.70(9)         | 177.24  |                 |                    |         |
| C22-C23-C24-C19 | -1.2(2)            | 0.35    |                 |                    |         |
| C20-C21 C22-C12 | -179.3(1)          | 179.87  |                 |                    |         |
| C20-C21-C22-C23 | -0.4(2)            | 0.52    |                 |                    |         |
| C12-C22 C23 C24 | -179.67(9)         | 179.30  |                 |                    |         |
| C21-C22-C23-C24 | 1.4(2)             | -1.35   |                 |                    |         |
| C20-C19-C24-C23 | -0.0(2)            | 1.40    |                 |                    |         |
| C19-C20-C21-C22 | -0.9(2)            | 1.33    |                 |                    |         |

**Table S7: Experimental and computed non-hydrogen atoms geometrical bond lengths of MK3**

| Atoms          | Bond Length (Å) |       | Atoms          | Bond Length (Å) |       |
|----------------|-----------------|-------|----------------|-----------------|-------|
|                | XRD             | DFT   |                | XRD             | DFT   |
| <b>C13-S1</b>  | 1.710(2)        | 1.724 | <b>C19-C20</b> | 1.380(4)        | 1.392 |
| <b>C16-S1</b>  | 1.670(3)        | 1.754 | <b>C1-C2</b>   | 1.380(5)        | 1.393 |
| <b>C7-C4</b>   | 1.485(3)        | 1.489 | <b>C19-C18</b> | 1.376(4)        | 1.403 |
| <b>C5-C4</b>   | 1.397(3)        | 1.420 | <b>C16-C15</b> | 1.354(5)        | 1.371 |
| <b>C3-C4</b>   | 1.388(3)        | 1.399 |                |                 |       |
| <b>C12-O1</b>  | 1.229(2)        | 1.220 |                |                 |       |
| <b>C11-N1</b>  | 1.339(3)        | 1.387 |                |                 |       |
| <b>C10-N1</b>  | 1.334(4)        | 1.328 |                |                 |       |
| <b>C11-C7</b>  | 1.400(3)        | 1.412 |                |                 |       |
| <b>C8-C7</b>   | 1.393(3)        | 1.397 |                |                 |       |
| <b>C12-C11</b> | 1.509(3)        | 1.510 |                |                 |       |
| <b>C9-C8</b>   | 1.394(3)        | 1.398 |                |                 |       |
| <b>C6-C5</b>   | 1.378(4)        | 1.391 |                |                 |       |
| <b>C13-C12</b> | 1.445(3)        | 1.479 |                |                 |       |
| <b>C14-C13</b> | 1.437(3)        | 1.387 |                |                 |       |
| <b>C10-C9</b>  | 1.399(3)        | 1.402 |                |                 |       |
| <b>C17-C9</b>  | 1.479(3)        | 1.482 |                |                 |       |
| <b>C22-C17</b> | 1.384(3)        | 1.403 |                |                 |       |
| <b>C18-C17</b> | 1.397(3)        | 1.403 |                |                 |       |
| <b>C2-C3</b>   | 1.387(3)        | 1.393 |                |                 |       |
| <b>C21-C22</b> | 1.392(4)        | 1.392 |                |                 |       |
| <b>C1-C6</b>   | 1.371(4)        | 1.394 |                |                 |       |
| <b>C20-C21</b> | 1.361(4)        | 1.394 |                |                 |       |
| <b>C15-C14</b> | 1.430(5)        | 1.414 |                |                 |       |

**Table S8: Experimental and computed non-hydrogen atoms geometrical bond angles of MK3**

| Atoms              | Bond Angle ( $\hat{\circ}$ ) |        | Atoms              | Bond Angle( $\hat{\circ}$ ) |        |
|--------------------|------------------------------|--------|--------------------|-----------------------------|--------|
|                    | XRD                          | DFT    |                    | XRD                         | DFT    |
| <b>C13-S1-C16</b>  | 92.3(1)                      | 91.33  | <b>C4-C3-C2</b>    | 120.5(2)                    | 120.61 |
| <b>C7-C4-C5</b>    | 120.3(2)                     | 120.79 | <b>C17-C22-C21</b> | 120.5(2)                    | 120.75 |
| <b>C7-C4-C3</b>    | 121.4(2)                     | 120.32 | <b>C5-C6-C1</b>    | 120.1(3)                    | 120.23 |
| <b>C5-C4-C3</b>    | 118.2(2)                     | 118.78 | <b>C22-C21-C20</b> | 120.9(3)                    | 120.24 |
| <b>C11-N1-C10</b>  | 117.4(2)                     | 119.80 | <b>C13-C14-C15</b> | 107.8(2)                    | 113.64 |
| <b>C4-C7-C11</b>   | 121.8(2)                     | 124.61 | <b>C21-C20-C19</b> | 119.4(3)                    | 120.21 |
| <b>C4-C7-C8</b>    | 121.3(2)                     | 120.59 | <b>C3-C2-C1</b>    | 120.2(3)                    | 120.16 |
| <b>C11-C7-C8</b>   | 116.9(2)                     | 116.59 | <b>C6-C1-C2</b>    | 120.0(3)                    | 119.60 |
| <b>N1-C11-C7</b>   | 123.8(2)                     | 122.32 | <b>C17-C18-C19</b> | 121.1(3)                    | 120.79 |
| <b>N1-C11-C12</b>  | 114.9(2)                     | 115.04 | <b>C14-C15-C16</b> | 114.6(3)                    | 112.15 |
| <b>C7-C11-C12</b>  | 121.0(2)                     | 122.47 | <b>S1-C16-C15</b>  | 113.1(2)                    | 112.45 |
| <b>C7-C8-C9</b>    | 120.9(2)                     | 121.52 | <b>C20-C19-C18</b> | 120.3(3)                    | 120.21 |
| <b>C4-C5-C6</b>    | 121.0(2)                     | 120.59 |                    |                             |        |
| <b>O1-C12-C11</b>  | 118.4(2)                     | 119.92 |                    |                             |        |
| <b>O1-C12-C13</b>  | 122.6(2)                     | 120.04 |                    |                             |        |
| <b>C11-C12-C13</b> | 119.0(2)                     | 120.02 |                    |                             |        |
| <b>S1-C13-C12</b>  | 119.4(2)                     | 127.07 |                    |                             |        |
| <b>S1-C13-C14</b>  | 112.2(2)                     | 110.39 |                    |                             |        |
| <b>C12-C13-C14</b> | 128.4(2)                     | 122.45 |                    |                             |        |
| <b>C8-C9-C10</b>   | 116.4(2)                     | 116.42 |                    |                             |        |
| <b>C8-C9-C17</b>   | 122.7(2)                     | 122.07 |                    |                             |        |
| <b>C10-C9-C17</b>  | 120.9(2)                     | 121.49 |                    |                             |        |
| <b>N1-C10-C9</b>   | 124.5(2)                     | 123.25 |                    |                             |        |
| <b>C9-C17-C22</b>  | 121.1(2)                     | 120.88 |                    |                             |        |
| <b>C9-C17-C18</b>  | 121.1(2)                     | 120.69 |                    |                             |        |
| <b>C22-C17-C18</b> | 117.8(2)                     | 118.42 |                    |                             |        |

**Table S9: Experimental and computed non-hydrogen atoms geometrical torsion angles of MK3**

| Atoms           | Torsion Angles (°) |         | Atoms           | Torsion Angles (°) |         |
|-----------------|--------------------|---------|-----------------|--------------------|---------|
|                 | XRD                | DFT     |                 | XRD                | DFT     |
| C16-S1-C13-C12  | 178.2(2)           | 176.25  | C7-C11-C12-C13  | 125.1(2)           | -152.90 |
| C16-S1-C13-C14  | 0.4(2)             | -0.72   | C7-C8-C9-C10    | 0.5(3)             | -1.23   |
| C13-S1-C16-C15  | -0.7(3)            | 0.84    | C7-C8-C9-C17    | 179.6(2)           | 179.63  |
| C5-C4-C7-C11    | -51.1(3)           | 58.14   | C4-C5-C6-C1     | -0.4(4)            | 0.18    |
| C5-C4-C7-C8     | 127.6(2)           | -118.67 | O1-C12-C13-S1   | -3.4(3)            | 176.26  |
| C3-C4-C7-C11    | 128.8(2)           | -125.46 | O1-C12-C13-C14  | 174.0(2)           | -7.09   |
| C3-C4-C7-C8     | -52.5(3)           | 57.71   | C11-C12-C13-S1  | 175.4(2)           | -3.31   |
| C7-C4-C5-C6     | 179.9(2)           | 176.80  | C11-C12-C13-C14 | -7.2(3)            | 173.31  |
| C3-C4-C5-C6     | -0.0(3)            | 0.36    | S1-C13-C14-C15  | -0.1(3)            | 0.44    |
| C7-C4-C3-C2     | -179.3(2)          | -177.25 | C12-C13-C14-C15 | -177.7(2)          | -176.69 |
| C5-C4-C3-C2     | 0.6(3)             | -0.79   | C8-C9-C10-N1    | -2.0(3)            | 1.50    |
| C10-N1-C11-C7   | 2.2(3)             | -2.52   | C17-C9-C10-N1   | 178.9(2)           | -179.36 |
| C10-N1-C11-C12  | -171.4(2)          | 173.12  | C8-C9-C17-C22   | 149.5(2)           | 139.48  |
| C11-N1-C10-C9   | 0.7(4)             | 0.33    | C8-C9-C17-C18   | -31.8(3)           | -40.75  |
| C4-C7-C11-N1    | 175.3(2)           | -174.20 | C10-C9-C17-C22  | -31.4(3)           | -39.68  |
| C4-C7-C11-C12   | -11.5(3)           | 10.47   | C10-C9-C17-C18  | 147.3(2)           | 140.15  |
| C8-C7-C11-N1    | -3.5(3)            | 2.68    | C9-C17-C22-C21  | 178.9(2)           | 179.81  |
| C8-C7-C11-C12   | 169.7(2)           | -172.64 | C18-C17-C22-C21 | 0.2(4)             | 0.009   |
| C4-C7-C8-C9     | -176.8(2)          | 176.35  | C9-C17-C18-C19  | -179.3(2)          | -179.73 |
| C11-C7-C8-C9    | 2.0(3)             | -0.72   | C22-C17-C18-C19 | -0.6(4)            | 0.07    |
| N1-C11-C12-O1   | 117.8(2)           | -147.91 | C4-C3-C2-C1     | -0.9(4)            | 0.67    |
| N1-C11-C12-C13  | -61.1(3)           | 31.67   | C17-C22-C21-C20 | 0.6(4)             | -0.08   |
| C7-C11-C12-O1   | -56.0(3)           | 27.72   | C5-C6-C1-C2     | 0.1(4)             | -0.30   |
| C22-C21-C20-C19 | -0.9(4)            | 0.07    |                 |                    |         |
| C13-C14-C15-C16 | -0.4(4)            | 0.17    |                 |                    |         |
| C21-C20-C19-C18 | 0.4(4)             | -0.07   |                 |                    |         |
| C3-C2-C1-C6     | 0.5(4)             | -0.12   |                 |                    |         |
| C17-C18-C19-C20 | 0.3(4)             | -0.07   |                 |                    |         |
| C14-C15-C16-S1  | 0.7(4)             | -0.73   |                 |                    |         |

**Table S10: Experimental and computed non-hydrogen atoms geometrical bond lengths of MK4**

| Atoms          | Bond Length (Å) |       | Atoms          | Bond Length (Å) |       |
|----------------|-----------------|-------|----------------|-----------------|-------|
|                | XRD             | DFT   |                | XRD             | DFT   |
| <b>C18-O1</b>  | 1.219(2)        | 1.218 | <b>C22-C23</b> | 1.409(2)        | 1.419 |
| <b>C9-N1</b>   | 1.341(2)        | 1.337 | <b>C28-C23</b> | 1.428(2)        | 1.419 |
| <b>C8-N1</b>   | 1.338(2)        | 1.330 | <b>C26-C25</b> | 1.378(2)        | 1.376 |
| <b>C12-C10</b> | 1.489(2)        | 1.487 | <b>C21-C20</b> | 1.412(2)        | 1.372 |
| <b>C9-C10</b>  | 1.401(2)        | 1.410 | <b>C1-C2</b>   | 1.391(2)        | 1.392 |
| <b>C11-C10</b> | 1.397(1)        | 1.397 | <b>C15-C16</b> | 1.384(2)        | 1.394 |
| <b>C13-C12</b> | 1.393(2)        | 1.400 | <b>C5-C4</b>   | 1.387(2)        | 1.392 |
| <b>C17-C12</b> | 1.403(2)        | 1.401 | <b>C15-C14</b> | 1.385(2)        | 1.394 |
| <b>C24-C19</b> | 1.446(2)        | 1.440 | <b>C6-C1</b>   | 1.370(2)        | 1.394 |
| <b>C18-C19</b> | 1.495(2)        | 1.493 | <b>C5-C6</b>   | 1.377(2)        | 1.394 |
| <b>C20-C19</b> | 1.382(2)        | 1.385 | <b>C27-C26</b> | 1.404(2)        | 1.412 |
| <b>C23-C24</b> | 1.435(2)        | 1.435 | <b>C21-C22</b> | 1.362(2)        | 1.372 |
| <b>C25-C24</b> | 1.418(2)        | 1.421 | <b>C27-C28</b> | 1.357(2)        | 1.373 |
| <b>C18-C9</b>  | 1.522(2)        | 1.493 |                |                 |       |
| <b>C7-C11</b>  | 1.390(2)        | 1.398 |                |                 |       |
| <b>C3-C7</b>   | 1.487(2)        | 1.482 |                |                 |       |
| <b>C8-C7</b>   | 1.392(2)        | 1.402 |                |                 |       |
| <b>C2-C3</b>   | 1.387(2)        | 1.403 |                |                 |       |
| <b>C4-C3</b>   | 1.390(2)        | 1.403 |                |                 |       |
| <b>C14-C13</b> | 1.387(2)        | 1.392 |                |                 |       |
| <b>C16-C17</b> | 1.385(2)        | 1.392 |                |                 |       |

**Table S11: Experimental and computed non-hydrogen atoms geometrical bond angles of MK4**

| Atoms              | Bond Angle ( $^{\circ}$ ) |        | Atoms              | Bond Angle( $^{\circ}$ ) |        |
|--------------------|---------------------------|--------|--------------------|--------------------------|--------|
|                    | XRD                       | DFT    |                    | XRD                      | DFT    |
| <b>C9-N1-C8</b>    | 117.7(1)                  | 119.07 | <b>C12-C13-C14</b> | 120.2(1)                 | 120.70 |
| <b>C12-C10-C9</b>  | 123.8(1)                  | 123.75 | <b>C12-C17-C16</b> | 120.3(1)                 | 120.72 |
| <b>C12-C10-C11</b> | 119.4(1)                  | 119.51 | <b>C24-C23-C22</b> | 120.5(1)                 | 119.80 |
| <b>C9-C10-C11</b>  | 116.7(1)                  | 116.68 | <b>C24-C23-C28</b> | 119.0(1)                 | 119.06 |
| <b>C10-C12-C13</b> | 120.9(1)                  | 121.20 | <b>C22-C23-C28</b> | 120.5(1)                 | 120.53 |
| <b>C10-C12-C7</b>  | 120.1(1)                  | 121.25 | <b>C24-C25-C26</b> | 120.9(1)                 | 120.93 |
| <b>C13-C12-C17</b> | 119.0(1)                  | 118.58 | <b>N1-C8-C7</b>    | 124.5(1)                 | 123.61 |
| <b>C24-C19-C18</b> | 123.0(1)                  | 122.49 | <b>C19-C20-C21</b> | 122.5(1)                 | 121.89 |
| <b>C24-C19-C20</b> | 118.9(1)                  | 119.48 | <b>C3-C2-C1</b>    | 120.7(1)                 | 120.79 |
| <b>C18-C19-C20</b> | 118.0(1)                  | 117.95 | <b>C17-C16-C15</b> | 120.2(1)                 | 120.17 |
| <b>C19-C24-C23</b> | 117.7(1)                  | 118.14 | <b>C3-C4-C5</b>    | 121.1(1)                 | 120.83 |
| <b>C19-C24-C25</b> | 124.4(1)                  | 124.02 | <b>C13-C14-C15</b> | 120.4(1)                 | 120.22 |
| <b>C23-C24-C25</b> | 117.9(1)                  | 117.80 | <b>C2-C1-C6</b>    | 120.7(1)                 | 120.25 |
| <b>N1-C9-C10</b>   | 123.4(1)                  | 122.83 | <b>C16-C15-C14</b> | 119.9(1)                 | 119.58 |
| <b>N1-C9-C18</b>   | 114.0(1)                  | 114.52 | <b>C1-C6-C5</b>    | 119.4(1)                 | 119.55 |
| <b>C10-C9-C18</b>  | 122.4(1)                  | 122.21 | <b>C25-C26-C27</b> | 121.0(1)                 | 121.04 |
| <b>C10-C11-C7</b>  | 121.3(1)                  | 121.25 | <b>C23-C22-C21</b> | 121.0(1)                 | 120.93 |
| <b>C11-C7-C3</b>   | 122.5(1)                  | 122.03 | <b>C23-C28-C27</b> | 121.2(1)                 | 120.89 |
| <b>C11-C7-C8</b>   | 116.3(1)                  | 116.50 | <b>C4-C5-C6</b>    | 120.3(1)                 | 120.21 |
| <b>C3-C7-C8</b>    | 121.1(1)                  | 121.46 | <b>C20-C21-C22</b> | 119.4(1)                 | 119.70 |
| <b>O1-C18-C19</b>  | 124.7(1)                  | 123.55 | <b>C26-C27-C28</b> | 120.0(1)                 | 119.64 |
| <b>O1-C18-C9</b>   | 117.2(1)                  | 117.86 |                    |                          |        |
| <b>C19-C18-C9</b>  | 118.1(1)                  | 118.56 |                    |                          |        |
| <b>C7-C3-C2</b>    | 121.8(1)                  | 120.90 |                    |                          |        |
| <b>C7-C3-C4</b>    | 120.3(1)                  | 120.74 |                    |                          |        |
| <b>C2-C3-C4</b>    | 117.9(1)                  | 118.35 |                    |                          |        |

**Table S12: Experimental and computed non-hydrogen atoms geometrical torsion angles of MK4**

| Atoms           | Torsion Angles (°) |         | Atoms           | Torsion Angles (°) |         |
|-----------------|--------------------|---------|-----------------|--------------------|---------|
|                 | XRD                | DFT     |                 | XRD                | DFT     |
| C8-N1-C9-C10    | 1.2(2)             | -1.82   | N1-C9-C18-C19   | 67.3(1)            | 53.03   |
| C8-N1-C9-C18    | 176.2(1)           | 170.83  | C10-C9-C18-O1   | 64.0(2)            | 47.15   |
| C9-N1-C8-C7     | 1.3(2)             | 1.21    | C10-C9-C18-C19  | -117.6(1)          | -134.26 |
| C9-C10-C12-C13  | 53.7(2)            | 51.91   | C10-C11-C7-C3   | -173.4(1)          | 179.45  |
| C9-C10-C12-C17  | -129.9(1)          | -130.32 | C10-C11-C7-C8   | 2.4(2)             | -1.06   |
| C11-C10-C12-C13 | -123.6(1)          | -125.85 | C11-C7-C3-C2    | -152.5(1)          | 139.98  |
| C11-C10-C12-C17 | 52.8(2)            | 51.90   | C11-C7-C3-C4    | 30.4(2)            | -40.24  |
| C12-C10-C9-N1   | -179.1(1)          | -176.86 | C8-C7-C3-C2     | 31.9(2)            | -39.47  |
| C12-C10-C9-C18  | 6.3(2)             | 11.04   | C8-C7-C3-C4     | -145.2(1)          | 140.30  |
| C11-C10-C9-N1   | -1.7(2)            | 0.96    | C11-C7-C8-N1    | -3.0(2)            | 0.204   |
| C11-C10-C9-C18  | -176.3(1)          | -171.12 | C3-C7-C8-N1     | 172.8(1)           | 179.68  |
| C12-C10-C11-C7  | 177.3(1)           | 178.44  | C7-C3-C2-C1     | -175.8(1)          | 179.71  |
| C9-C10-C11-C7   | -0.2(2)            | 0.513   | C4-C3-C2-C1     | 1.4(2)             | -0.01   |
| C10-C12-C13-C14 | 175.2(1)           | 178.03  | C7-C3-C4-C5     | 176.3(1)           | -179.77 |
| C17-C12-C13-C14 | -1.2(2)            | 0.24    | C2-C3-C4-C5     | -0.9(2)            | 0.004   |
| C10-C12-C17-C16 | -176.8(1)          | -178.26 | C12-C13-C14-C15 | 1.4(2)             | 0.02    |
| C13-C12-C17-C16 | -0.4(2)            | -0.44   | C12-C17-C16-C15 | 1.8(2)             | 0.383   |
| C18-C19-C24-C23 | -178.0(1)          | -176.58 | C24-C23-C22-C21 | 0.8(2)             | -1.04   |
| C18-C19-C24-C25 | 0.8(2)             | 5.10    | C28-C23-C22-C21 | -177.5(1)          | 178.83  |
| C20-C19-C24-C23 | -0.5(2)            | 0.249   | C24-C23-C28-C27 | 0.5(2)             | 0.410   |
| C20-C19-C24-C25 | 178.3(1)           | -178.06 | C22-C23-C28-C27 | 178.8(1)           | -179.47 |
| C24-C19-C18-O1  | 4.4(2)             | 22.70   | C24-C25-C26-C27 | -0.0(2)            | 0.301   |
| C24-C19-C18-C9  | -173.9(1)          | -155.78 | C19-C20-C21-C22 | -1.1(2)            | 1.39    |
| C20-C19-C18-O1  | -173.1(1)          | -154.16 | C3-C2-C1-C6     | -0.7(2)            | 0.01    |
| C20-C19-C18-C9  | 8.6(2)             | 27.33   | C17-C16-C15-C14 | -1.6(2)            | -0.107  |
| C24-C19-C20-C21 | 1.4(2)             | -1.44   | C3-C4-C5-C6     | -0.3(2)            | 0.008   |
| C18-C19-C20-C21 | 178.9(1)           | 175.52  | C13-C14-C15-C16 | -0.0(2)            | -0.09   |
| C19-C24-C23-C22 | -0.5(2)            | 0.969   | C2-C1-C6-C5     | -0.5(2)            | 0.0003  |
| C19-C24-C23-C28 | 177.8(1)           | -178.91 | C1-C6-C5-C4     | 1.0(2)             | -0.0011 |
| C25-C24-C23-C22 | -179.4(1)          | 179.38  | C25-C26-C27-C28 | -0.7(2)            | -0.399  |
| C25-C24-C23-C28 | -1.1(2)            | -0.49   | C23-C22-C21-C20 | -0.0(2)            | -0.116  |
| C19-C24-C25-C26 | -177.9(1)          | 178.46  | C23-C28-C27-C26 | 0.4(2)             | 0.037   |
| C23-C24-C25-C26 | 0.9(2)             | 0.14    |                 |                    |         |
| N1-C9-C18-O1    | -111.1(1)          | -125.54 |                 |                    |         |

**Table S13: Prominent X-H...Cg (Pi-Ring) Interaction Analysis**

| Molecule   | X-H                   | Cg(J)              | H...Cg<br>(Å°) | H⊥<br>(Å°) | γ (°) | X-H...Cg<br>(°) | X...Cg<br>(Å°) | X-<br>H...π<br>(°) |
|------------|-----------------------|--------------------|----------------|------------|-------|-----------------|----------------|--------------------|
| <b>MK1</b> | C10-H10               | Cg3 <sup>i</sup>   | 2.98           | 2.76       | 22.18 | 160             | 3.8721(16)     | 50                 |
|            | C12-H12               | Cg4 <sup>ii</sup>  | 2.88           | -2.78      | 15.08 | 167             | 3.7937(15)     | 66                 |
|            | C26-H26B              | Cg1 <sup>iii</sup> | 3.00           | 2.97       | 8.68  | 162             | 3.9237(15)     | 63                 |
| <b>MK2</b> | C10-H10               | Cg3 <sup>i</sup>   | 2.73           | -2.72      | 3.33  | 137             | 3.4701(13)     | 46                 |
| <b>MK3</b> | No interactions found |                    |                |            |       |                 |                |                    |
| <b>MK4</b> | C6-H6                 | Cg3 <sup>i</sup>   | 2.81           | 2.77       | 9.57  | 154             | 3.6643(19)     | 54                 |
|            | C22-H22               | Cg2 <sup>ii</sup>  | 2.87           | 2.79       | 13.27 | 175             | 3.7932(19)     | 74                 |

**MK1 i:** X,-1+Y, Z **ii:** 1-X, 1-Y, 1-Z **iii:** 3/2-X, 1/2+Y, 3/2-Z **Cg1:** N4-C2-C3-C4-C5-C6.

**Cg3:** C13-C14-C15-C16-C17-C18, **Cg4:** C20-C21-C22-C23-C24-C25

**MK2 i:** 1-X,-Y, 1-Z **Cg3:** C13-C14-C15-C16-C17-C18

**MK4 i:** -1+X, Y,-1+Z **ii:** -X,1-Y,1-Z **Cg2:** C1-C2-C3-C4-C5-C6, **Cg3:** C13-C14-C15-C16-C17-C18

**Table S14: Prominent Cg-Cg Interaction Analysis of Rings**

| Molecule   | CgI | CgJ                | CgI -CgJ   | α(°)      | β(°) | γ(°) | CgI⊥ (Å)   | CgJ⊥ (Å)   | Slippage (Å) |
|------------|-----|--------------------|------------|-----------|------|------|------------|------------|--------------|
| <b>MK1</b> | Cg1 | Cg3 <sup>i</sup>   | 4.7885(7)  | 54.47(6)  | 17.7 | 63.4 | -2.1437(4) | -4.5616(6) | -            |
|            | Cg3 | Cg4 <sup>i</sup>   | 4.9502(7)  | 58.92(6)  | 20.1 | 78.7 | -0.9662(6) | -4.6475(5) | -            |
| <b>MK2</b> | Cg2 | Cg2 <sup>i</sup>   | 3.7548(7)  | 0.00(6)   | 25.2 | 25.2 | -3.3983(5) | -3.3984(5) | 1.597        |
|            | Cg3 | Cg2 <sup>i</sup>   | 4.7141(7)  | 46.75(6)  | 20.9 | 67.3 | -1.8157(5) | -4.4038(5) | -            |
|            | Cg4 | Cg4 <sup>ii</sup>  | 4.0402(7)  | 0.00(6)   | 27   | 27   | -3.6006(5) | -3.6006(5) | 1.833        |
| <b>MK3</b> | Cg4 | Cg4 <sup>i</sup>   | 3.8405(16) | 0.02(13)  | 14.5 | 14.5 | 3.7181(11) | 3.7181(11) | 0.962        |
|            | Cg4 | Cg1 <sup>ii</sup>  | 3.8746(15) | 4.72(13)  | 23.5 | 27.1 | 3.4484(11) | 3.5532(11) | 1.545        |
|            | Cg2 | Cg3 <sup>iii</sup> | 4.7608(14) | 49.14(12) | 10.5 | 59.2 | 2.4411(9)  | 4.6809(11) | -            |
|            | Cg4 | Cg4 <sup>iv</sup>  | 3.8405(16) | 0.02(13)  | 14.5 | 14.5 | 3.7181(11) | 3.7181(11) | 0.962        |
| <b>MK4</b> | Cg2 | Cg2 <sup>i</sup>   | 3.6838(19) | 0         | 11.8 | 11.8 | 3.6061(1)  | 3.6061(1)  | 0.752        |
|            | Cg4 | Cg5 <sup>ii</sup>  | 3.8076(19) | 2         | 25.8 | 27.7 | 3.3721(1)  | 3.4272(1)  | 1.659        |
|            | Cg5 | Cg5 <sup>ii</sup>  | 3.7811(19) | 0         | 25.6 | 25.6 | 3.4093(1)  | 3.4093(1)  | 1.635        |
|            | Cg5 | Cg6 <sup>ii</sup>  | 3.5863(18) | 1         | 19.2 | 18.8 | 3.3953(1)  | 3.3871(1)  | 1.179        |
|            | Cg6 | Cg6 <sup>ii</sup>  | 3.7980(19) | 0         | 26.7 | 26.7 | 3.3920(1)  | 3.3920(1)  | 1.709        |

**MK1 i:** 1-X, 1-Y, 1-Z **Cg1:** N4-C2-C3-C4-C5-C6. **Cg3:** C13-C14-C15-C16-C17-C18, **Cg4:** C20-C21-C22-C23-C24-C25

**MK2 i:** 1-X,-Y, 1-Z **ii:** 1-X, 1-Y,1-Z **Cg2:** C7-C8-C9-C10-C11-C12, **Cg3:** C13-C14-C15-C16-C17-C18 **Cg4:** C19-C20-C21-C22-C23-C24

**MK3 i:** 2-X, 2-Y,-Z **ii:** 1/2+X, 3/2-Y,-1/2+Z **iii:** 3/2-X,1/2+Y,1/2-Z **iv:** 1-X,1-Y,-Z **Cg1:** S1-C13-C14-C15-C16, **Cg2:** N1-C8-C7-C11-C10-C9, **Cg3:** C1-C2-C3-C4-C5-C6, **Cg4:** C17-C18-C19-C20-C21-C22

**MK4 i:** -X,-Y,-Z **ii:** 1-X, 1-Y,2-Z **Cg1:** N1-C8-C7-C11-C10-C9, **Cg2:** C1-C2-C3-C4-C5-C6, **Cg4:** C19-C20-C21-C22-C23-C24, **Cg5:** C23-C24-C25-C26-C27-C28, **Cg6:** C19-C20-C21-C22-C23-C28-C27-C26

**Table S15: Prominent Y-X...Cg (Pi-Ring) Interaction Analysis**

| Molecule | X-H                   | Cg(J)            | X...Cg<br>(Å°) | H⊥<br>(Å°) | γ (°) | Y-X...Cg<br>(°) | Y...Cg<br>(Å°) | X-H...π<br>(°) |
|----------|-----------------------|------------------|----------------|------------|-------|-----------------|----------------|----------------|
| MK1      | No interactions found |                  |                |            |       |                 |                |                |
| MK2      | C24-Cl1               | Cg1 <sup>i</sup> | 3.4527(6)      | -3.331     | 16.99 | 144.30(4)       | 4.9972(12)     | 58.75          |
| MK3      | No interactions found |                  |                |            |       |                 |                |                |
| MK4      | No interactions found |                  |                |            |       |                 |                |                |

**MK2 i:** X, 1/2-Y, 1/2+Z **Cg1:** N1-C2-C3-C4-C5-C6

**Table S16: The molecular pairs with interaction energies calculated using energy framework analysis**

| N          | Symmetry operations   | R     | E <sub>ele</sub> | E <sub>pol</sub> | E <sub>dis</sub> | E <sub>rep</sub> | E <sub>tot</sub> |
|------------|-----------------------|-------|------------------|------------------|------------------|------------------|------------------|
| <b>MK1</b> |                       |       |                  |                  |                  |                  |                  |
| 2          | x, y, z               | 11.02 | -5.6             | -2.2             | -19.1            | 11.2             | -17.2            |
| 2          | -x+1/2, y+1/2, -z+1/2 | 11.32 | -4.2             | -2.0             | -16.6            | 7.8              | -15.6            |
| 2          | x, y, z               | 11.99 | -8.9             | -0.6             | -24.9            | 17.1             | -21.0            |
| 2          | -x+1/2, y+1/2, -z+1/2 | 8.14  | -13.6            | -1.7             | -39.8            | 27.7             | -33.2            |
| 2          | x+1/2, -y+1/2, z+1/2  | 12.23 | 0.3              | -0.6             | -10.0            | 0.0              | -8.8             |
| 1          | -x, -y, -z            | 3.83  | -24.2            | -3.7             | -119.3           | 75.9             | -85.3            |
| 1          | -x, -y, -z            | 9.65  | -8.3             | -2.3             | -22.4            | 9.2              | -24.3            |
| 2          | x+1/2, -y+1/2, z+1/2  | 11.52 | -10.9            | -3.3             | -8.3             | 12.4             | -13.5            |
| 1          | -x, -y, -z            | 11.90 | 0.2              | -0.2             | -7.2             | 0.9              | -5.6             |
| 1          | -x, -y, -z            | 14.83 | -10.2            | -4.8             | -16.8            | 0.0              | -28.9            |

| N          | Symmetry operations | R     | E <sub>ele</sub> | E <sub>pol</sub> | E <sub>dis</sub> | E <sub>rep</sub> | E <sub>tot</sub> |
|------------|---------------------|-------|------------------|------------------|------------------|------------------|------------------|
| <b>MK2</b> |                     |       |                  |                  |                  |                  |                  |
| 1          | x, -y+1/2, z+1/2    | 9.15  | -8.8             | -1.7             | -25.0            | 16.0             | -22.5            |
| 2          | x, -y+1/2, z+1/2    | 5.64  | -10.3            | -0.6             | -52.7            | 35.7             | -35.1            |
| 2          | x, y, z             | 9.00  | -4.8             | -0.8             | -17.5            | 9.8              | -14.8            |
| 1          | -x, -y, -z          | 10.71 | -17.0            | -2.9             | -55.8            | 45.0             | -41.0            |
| 2          | -x, y+1/2, -z+1/2   | 10.87 | -12.3            | -3.0             | -22.9            | 24.9             | -19.7            |
| 1          | -x, -y, -z          | 9.57  | -6.7             | -4.8             | -47.2            | 29.0             | -33.8            |
| 1          | -x, -y, -z          | 13.01 | 6.0              | -0.7             | -29.5            | 0.0              | -19.9            |
| 2          | -x, y+1/2, -z+1/2   | 13.27 | 2.7              | -0.5             | -11.2            | 0.0              | -7.2             |
| 1          | x, -y+1/2, z+1/2    | 9.15  | -8.8             | -3.7             | -25.0            | 16.0             | -23.9            |

|            | N | Symmetry operations   | R     | E <sub>ele</sub> | E <sub>pol</sub> | E <sub>dis</sub> | E <sub>rep</sub> | E <sub>tot</sub> |
|------------|---|-----------------------|-------|------------------|------------------|------------------|------------------|------------------|
| <b>MK3</b> |   |                       |       |                  |                  |                  |                  |                  |
|            | 2 | -x+1/2, y+1/2, -z+1/2 | 10.68 | -15.4            | -3.4             | -22.5            | 21.9             | -24.8            |
|            | 2 | x, y, z               | 9.69  | -6.3             | -2.1             | -14.2            | 9.9              | -14.5            |
|            | 2 | -x+1/2, y+1/2, -z+1/2 | 7.06  | -4.4             | -1.1             | -36.6            | 17.2             | -26.8            |
|            | 2 | x, y, z               | 10.02 | 0.3              | -0.6             | -11.3            | 5.0              | -6.8             |
|            | 2 | x+1/2, -y+1/2, z+1/2  | 11.42 | -2.8             | -0.9             | -29.3            | 19.1             | -17.3            |
|            | 1 | -x, -y, -z            | 5.67  | -9.8             | -5.4             | -49.3            | 21.9             | -43.8            |
|            | 1 | -x, -y, -z            | 10.42 | -2.5             | -0.6             | -23.8            | 13.4             | -15.5            |
|            | 1 | -x, -y, -z            | 7.36  | -16.5            | -3.5             | -34.2            | 29.2             | -31.8            |
|            | 1 | -x, -y, -z            | 11.43 | -0.1             | -0.5             | -27.1            | 10.7             | -17.5            |

|            | N | Symmetry operations | R     | E <sub>ele</sub> | E <sub>pol</sub> | E <sub>dis</sub> | E <sub>rep</sub> | E <sub>tot</sub> |
|------------|---|---------------------|-------|------------------|------------------|------------------|------------------|------------------|
| <b>MK4</b> |   |                     |       |                  |                  |                  |                  |                  |
|            | 2 | x, y, z             | 9.77  | -3.4             | -1.5             | -18.1            | 12.1             | -13.0            |
|            | 2 | x, y, z             | 11.15 | -8.5             | -1.5             | -33.6            | 19.9             | -27.1            |
|            | 1 | -x, -y, -z          | 10.45 | -7.8             | -2.6             | -66.1            | 43.7             | -40.7            |
|            | 2 | x, y, z             | 11.65 | -7.3             | -2.1             | -28.7            | 18.6             | -22.9            |
|            | 1 | -x, -y, -z          | 7.13  | -11.2            | -1.6             | -46.6            | 28.6             | -35.9            |
|            | 1 | -x, -y, -z          | 6.78  | -3.0             | -0.5             | -35.9            | 12.9             | -26.8            |
|            | 1 | -x, -y, -z          | 10.87 | -2.0             | -1.4             | -7.4             | 1.0              | -8.9             |
|            | 1 | -x, -y, -z          | 6.89  | -5.9             | -3.1             | -38.8            | 18.8             | -30.7            |
|            | 1 | -x, -y, -z          | 7.26  | -15.5            | -5.5             | -42.0            | 23.9             | -42.2            |
|            | 1 | -x, -y, -z          | 12.10 | 13.3             | -1.0             | -38.6            | 0.0              | -20.2            |

**Table S17:** The interaction energy calculated for components selected molecular pairs C1-H1A...O3, C26-H26A...O1 interactions in MK1 and C16-H16...O1, C19-H19...O1 interactions in MK2 using energy framework analysis.

**MK1**

| N | Symmetry operations  | R     | E <sub>ele</sub> | E <sub>pol</sub> | E <sub>dis</sub> | E <sub>rep</sub> | E <sub>tot</sub> |
|---|----------------------|-------|------------------|------------------|------------------|------------------|------------------|
| 1 | x+1/2, -y+1/2, z+1/2 | 11.52 | -10.9            | -3.3             | -8.3             | 12.4             | -13.5            |
| 1 | -x, -y, -z           | 14.83 | -10.2            | -4.8             | -16.8            | 0.0              | -28.9            |

**MK3**

| N | Symmetry operations   | R     | E <sub>ele</sub> | E <sub>pol</sub> | E <sub>dis</sub> | E <sub>rep</sub> | E <sub>tot</sub> |
|---|-----------------------|-------|------------------|------------------|------------------|------------------|------------------|
| 1 | -x+1/2, y+1/2, -z+1/2 | 10.68 | -15.4            | -3.4             | -22.5            | 21.9             | -24.8            |
| 1 | x, y, z               | 9.69  | -6.3             | -2.1             | -14.2            | 9.9              | -14.5            |

**Table S18: Selected Lewis and non-Lewis interactions via a second order natural bond orbital perturbation theory corresponding to the fock matrix.**

| Donor (i)   | ED (i)(e) | Acceptor(j) | ED (j)(e) | E <sup>2</sup><br>kJ/mol | ΔE <sup>a</sup> | F( i,j) <sup>b</sup><br>a.u. |
|-------------|-----------|-------------|-----------|--------------------------|-----------------|------------------------------|
| <b>MK1</b>  |           |             |           |                          |                 |                              |
| π(C3-C2)    | 1.60      | π*(N4-C6)   | 0.40      | 92.18                    | 0.26            | 0.064                        |
|             |           | π*(C5-C4)   | 0.31      | 97.72                    | 0.28            | 0.069                        |
| π(N4-C6)    | 1.71      | π*(C3-C2)   | 0.33      | 118.47                   | 0.32            | 0.081                        |
|             |           | π*(C5-C4)   | 0.31      | 63.44                    | 0.33            | 0.059                        |
| π(C5-C4)    | 1.62      | π*(C3-C2)   | 0.33      | 93.24                    | 0.28            | 0.066                        |
|             |           | π*(N4-C6)   | 0.40      | 126.12                   | 0.26            | 0.075                        |
| π(C7-C8)    | 1.63      | π*(C9-C10)  | 0.33      | 98.59                    | 0.28            | 0.068                        |
|             |           | π*(C11-C12) | 0.32      | 91.17                    | 0.28            | 0.066                        |
| π(C13-C14)  | 1.64      | π*(C15-C16) | 0.33      | 98.92                    | 0.28            | 0.068                        |
|             |           | π*(C17-C18) | 0.32      | 93.53                    | 0.28            | 0.066                        |
| π(C20-C25)  | 1.64      | π*(C19-O3)  | 0.16      | 99.12                    | 0.27            | 0.070                        |
|             |           | π*(C24-C23) | 0.38      | 87.03                    | 0.26            | 0.062                        |
|             |           | π*(C22-C21) | 0.35      | 99.93                    | 0.27            | 0.067                        |
| π(C25-C24)  | 1.66      | π*(C20-C25) | 0.37      | 102.92                   | 0.30            | 0.072                        |
|             |           | π*(C22-C21) | 0.35      | 77.60                    | 0.29            | 0.061                        |
| π(C22-C21)  | 1.70      | π*(C20-C25) | 0.37      | 80.24                    | 0.30            | 0.064                        |
|             |           | π*(C24-C23) | 0.38      | 90.02                    | 0.28            | 0.066                        |
| π(C15-C16)  | 1.65      | π*(C13-C14) | 0.35      | 95.84                    | 0.28            | 0.068                        |
|             |           | π*(C17-C18) | 0.32      | 96.08                    | 0.28            | 0.067                        |
| π(C17-C18)  | 1.66      | π*(C13-C14) | 0.35      | 97.43                    | 0.28            | 0.067                        |
|             |           | π*(C15-C16) | 0.33      | 96.71                    | 0.28            | 0.067                        |
| π(C9-C10)   | 1.65      | π*(C7-C8)   | 0.36      | 96.52                    | 0.28            | 0.067                        |
|             |           | π*(C10-C11) | 0.32      | 95.41                    | 0.28            | 0.067                        |
| π(C11-C12)  | 1.66      | π*(C7-C8)   | 0.36      | 96.90                    | 0.28            | 0.067                        |
|             |           | π*(C9-C10)  | 0.33      | 95.60                    | 0.28            | 0.067                        |
| σ(C1-H1C)   | 1.99      | σ*(C1-H1C)  | 0.01      | 52.13                    | 3.60            | 0.177                        |
| LP ( 1) N4  | 1.91      | σ*(C3-C2)   | 0.03      | 49.00                    | 0.89            | 0.086                        |
|             |           | σ*(C6-C5)   | 0.04      | 52.13                    | 0.91            | 0.089                        |
| LP ( 2) O 3 | 1.88      | π*(C6-C19)  | 0.07      | 99.98                    | 0.66            | 0.106                        |
|             |           | π*(C19-C20) | 0.06      | 88.43                    | 0.71            | 0.104                        |
| LP ( 2) O 2 | 1.82      | π*(C25-C24) | 0.38      | 154.04                   | 0.34            | 0.098                        |
| LP ( 2) O 1 | 1.84      | π*(C23-C22) | 0.35      | 142.63                   | 0.34            | 0.094                        |

| Donor (i)  | ED (i)(e) | Acceptor(j) | ED (j)(e) | E <sup>2</sup><br>kJ/mol | ΔE <sup>a</sup> | F( i,j) <sup>b</sup><br>a.u. |
|------------|-----------|-------------|-----------|--------------------------|-----------------|------------------------------|
| <b>MK2</b> |           |             |           |                          |                 |                              |
| π(C3-C4)   | 1.61      | π*(C2-N1)   | 0.36      | 107.23                   | 0.27            | 0.074                        |
|            |           | π*(C6-C5)   | 0.35      | 85.35                    | 0.29            | 0.069                        |
| π(C2-N1)   | 1.72      | π*(C3-C4)   | 0.33      | 57.19                    | 0.33            | 0.061                        |
|            |           | π*(C6-C5)   | 0.35      | 98.07                    | 0.33            | 0.081                        |
| π(C6-C5)   | 1.58      | π*(C3-C4)   | 0.33      | 84.26                    | 0.28            | 0.069                        |
|            |           | π*(C2-N1)   | 0.36      | 82.25                    | 0.26            | 0.065                        |
| π(C7-C8)   | 1.64      | π*(C9-C10)  | 0.33      | 84.14                    | 0.28            | 0.067                        |
| π(C13-C14) | 1.96      | σ*(C11-H11) | 0.01      | 125.14                   | 4.97            | 0.346                        |
|            |           | σ*(C12-H12) | 0.01      | 105.06                   | 3.09            | 0.250                        |
| π(C13-C14) | 1.64      | π*(C15-C16) | 0.33      | 86.35                    | 0.28            | 0.068                        |
|            |           | π*(C17-C18) | 0.01      | 80.75                    | 0.28            | 0.067                        |
| π(C19-C24) | 1.65      | π*(C20-C21) | 0.29      | 79.70                    | 0.30            | 0.068                        |
|            |           | π*(C14-C15) | 0.38      | 86.02                    | 0.28            | 0.068                        |
| π(C20-C21) | 1.65      | π*(C11-C16) | 0.41      | 82.71                    | 0.27            | 0.067                        |

|                          |       |                            |      |        |      |       |
|--------------------------|-------|----------------------------|------|--------|------|-------|
|                          |       | $\pi^*(\text{C14-C15})$    | 0.38 | 96.73  | 0.27 | 0.071 |
| $\pi(\text{C22-C23})$    | 1.67  | $\pi^*(\text{C11-C16})$    | 0.41 | 80.37  | 0.29 | 0.068 |
|                          |       | $\pi^*(\text{C12-C13})$    | 0.29 | 71.71  | 0.30 | 0.065 |
| $\pi(\text{C15-C16})$    | 1.65  | $\pi^*(\text{C13-C14})$    | 0.35 | 84.76  | 0.28 | 0.068 |
|                          |       | $\pi^*(\text{C17-C16})$    | 0.31 | 83.21  | 0.28 | 0.068 |
| $\pi(\text{C17-C18})$    | 1.66  | $\pi^*(\text{C13-C14})$    | 0.35 | 87.06  | 0.28 | 0.069 |
|                          |       | $\pi^*(\text{C15-C16})$    | 0.33 | 85.64  | 0.28 | 0.068 |
| $\pi(\text{C9-C10})$     | 1.65  | $\pi^*(\text{C7-C22})$     | 0.36 | 85.93  | 0.28 | 0.068 |
| $\sigma(\text{C11-C12})$ | 1.97  | $\sigma^*(\text{C25-H42})$ | 0.01 | 91.75  | 5.00 | 0.296 |
| $\pi(\text{C11-C12})$    | 1.66  | $\pi^*(\text{C7-C8})$      | 0.36 | 85.35  | 0.28 | 0.069 |
|                          |       | $\pi^*(\text{C9-C10})$     | 0.33 | 85.43  | 0.29 | 0.068 |
| $\sigma(\text{C12-H12})$ | 1.97  | $\sigma^*(\text{C11-H11})$ | 0.01 | 288.61 | 4.80 | 0.515 |
|                          |       | $\sigma^*(\text{C12-H12})$ | 0.01 | 127.69 | 2.92 | 0.267 |
| LP (1) N1                | 1.910 | $\pi^*(\text{C6-C5})$      | 0.04 | 42.50  | 0.89 | 0.086 |
| LP (2) O1                | 1.879 | $\sigma^*(\text{C6-C1})$   | 0.07 | 81.29  | 0.68 | 0.103 |
|                          |       | $\sigma^*(\text{C1-C19})$  | 0.06 | 84.26  | 0.68 | 0.106 |
| LP (2) C1 2              | 1.92  | $\pi^*(\text{C22-C23})$    | 0.38 | 54.55  | 0.32 | 0.063 |
| LP (2) C1 1              | 1.92  | $\pi^*(\text{C19-C24})$    | 0.41 | 53.80  | 0.33 | 0.064 |

| Donor (i)             | ED (i)(e) | Acceptor(j)                | ED (j)(e) | E <sup>2</sup><br>kJ/mol | $\Delta E^a$ | F(i,j) <sup>b</sup><br>a.u. |
|-----------------------|-----------|----------------------------|-----------|--------------------------|--------------|-----------------------------|
| <b>MK3</b>            |           |                            |           |                          |              |                             |
| $\pi(\text{C7-C8})$   | 1.610     | $\pi^*(\text{C10-N1})$     | 0.371     | 104.99                   | 0.26         | 0.074                       |
|                       |           | $\pi^*(\text{C10-C9})$     | 0.354     | 79.91                    | 0.28         | 0.068                       |
| $\pi(\text{C10-N1})$  | 1.730     | $\pi^*(\text{C7-C8})$      | 0.332     | 52.67                    | 0.33         | 0.060                       |
|                       |           | $\pi^*(\text{C9-C10})$     | 0.354     | 91.57                    | 0.33         | 0.079                       |
| $\pi(\text{C11-7})$   | 1.579     | $\pi^*(\text{C7-C8})$      | 0.332     | 81.44                    | 0.28         | 0.069                       |
|                       |           | $\pi^*(\text{C2-N3})$      | 0.371     | 81.20                    | 0.26         | 0.065                       |
|                       |           | $\pi^*(\text{C12-O1})$     | 0.199     | 49.22                    | 0.28         | 0.055                       |
| $\pi(\text{C4-C5})$   | 1.638     | $\pi^*(\text{C6-C1})$      | 0.330     | 81.44                    | 0.28         | 0.068                       |
|                       |           | $\pi^*(\text{C2-C3})$      | 0.320     | 77.38                    | 0.28         | 0.066                       |
| $\pi(\text{C17-C18})$ | 1.650     | $\pi^*(\text{C19-C20})$    | 0.331     | 82.48                    | 0.28         | 0.068                       |
|                       |           | $\pi^*(\text{C21-C22})$    | 0.317     | 77.22                    | 0.28         | 0.066                       |
| $\pi(\text{C13-C14})$ | 1.780     | $\pi^*(\text{C12-O1})$     | 0.199     | 89.19                    | 0.28         | 0.07                        |
|                       |           | $\pi^*(\text{C15-C16})$    | 0.312     | 63.28                    | 0.28         | 0.06                        |
| $\pi(\text{C19-C20})$ | 1.662     | $\pi^*(\text{C17-C18})$    | 0.355     | 79.27                    | 0.28         | 0.067                       |
|                       |           | $\pi^*(\text{C21-C22})$    | 0.317     | 79.51                    | 0.28         | 0.067                       |
| $\pi(\text{C21-C22})$ | 1.664     | $\pi^*(\text{C17-C18})$    | 0.355     | 81.88                    | 0.28         | 0.068                       |
|                       |           | $\pi^*(\text{C19-C20})$    | 0.331     | 80.84                    | 0.28         | 0.067                       |
| $\pi(\text{C6-C1})$   | 1.652     | $\pi^*(\text{C1-C6})$      | 0.365     | 81.36                    | 0.28         | 0.067                       |
|                       |           | $\pi^*(\text{C2-C3})$      | 0.320     | 80.60                    | 0.28         | 0.067                       |
| $\pi(\text{C2-C3})$   | 1.666     | $\pi^*(\text{C4-C5})$      | 0.365     | 80.72                    | 0.28         | 0.067                       |
|                       |           | $\pi^*(\text{C6-C1})$      | 0.330     | 79.87                    | 0.28         | 0.067                       |
| $\pi(\text{C15-C16})$ | 1.819     | $\pi^*(\text{C13-C14})$    | 0.342     | 72.88                    | 0.28         | 0.068                       |
| LP (1) N1             | 1.902     | $\pi^*(\text{C10-C9})$     | 0.039     | 43.11                    | 0.89         | 0.089                       |
| LP (2) O1             | 1.878     | $\sigma^*(\text{C7-C5})$   | 0.071     | 80.11                    | 0.67         | 0.104                       |
|                       |           | $\sigma^*(\text{C12-C13})$ | 0.062     | 78.51                    | 0.70         | 0.106                       |
| LP (2) S1             | 1.599     | $\sigma^*(\text{C13-C14})$ | 0.342     | 80.52                    | 0.26         | 0.066                       |
|                       |           | $\sigma^*(\text{C15-C16})$ | 0.312     | 96.47                    | 0.25         | 0.071                       |

| Donor (i)  | ED (i)(e) | Acceptor(j) | ED (j)(e) | E <sup>2</sup><br>kJ/mol | ΔE <sup>a</sup> | F(i,j) <sup>b</sup><br>a.u. |
|------------|-----------|-------------|-----------|--------------------------|-----------------|-----------------------------|
| <b>MK4</b> |           |             |           |                          |                 |                             |
| π(C6-C1)   | 1.654     | π*(C5-C4)   | 0.321     | 84.14                    | 0.28            | 0.067                       |
|            |           | π*(C3-C2)   | 0.364     | 84.14                    | 0.28            | 0.067                       |
| π(C5-C4)   | 1.667     | π*(C6-C1)   | 0.331     | 83.05                    | 0.28            | 0.067                       |
|            |           | π*(C3-C2)   | 0.364     | 84.01                    | 0.28            | 0.067                       |
| π(C7-C11)  | 1.616     | π*(C3-C2)   | 0.364     | 39.07                    | 0.29            | 0.046                       |
|            |           | π*(C8-N1)   | 0.372     | 109.83                   | 0.26            | 0.074                       |
| π(C8-N1)   | 1.722     | π*(C9-C10)  | 0.355     | 81.83                    | 0.29            | 0.067                       |
|            |           | π*(C7-C11)  | 0.337     | 55.81                    | 0.33            | 0.060                       |
| π(C9-C10)  | 1.588     | π*(C9-C10)  | 0.355     | 98.70                    | 0.33            | 0.080                       |
|            |           | π*(C7-C11)  | 0.337     | 86.48                    | 0.28            | 0.069                       |
| π(C12-C13) | 1.644     | π*(C8-N1)   | 0.372     | 80.87                    | 0.26            | 0.064                       |
|            |           | π*(C16-C15) | 0.332     | 85.81                    | 0.28            | 0.068                       |
| π(C16-C15) | 1.657     | π*(C14-C13) | 0.320     | 81.12                    | 0.28            | 0.066                       |
|            |           | π*(C12-C17) | 0.358     | 83.38                    | 0.28            | 0.068                       |
| π(C14-C13) | 1.663     | π*(C14-C13) | 0.320     | 83.59                    | 0.28            | 0.067                       |
|            |           | π*(C18-C17) | 0.358     | 84.85                    | 0.28            | 0.067                       |
| π(C19-C20) | 1.690     | π*(C16-C15) | 0.332     | 83.80                    | 0.28            | 0.067                       |
|            |           | π*(C18-O1)  | 0.153     | 78.86                    | 0.27            | 0.066                       |
| π(C21-C22) | 1.720     | π*(C21-C22) | 0.250     | 65.47                    | 0.29            | 0.061                       |
|            |           | π*(C23-C24) | 0.453     | 67.32                    | 0.29            | 0.063                       |
| π(C23-C24) | 1.528     | π*(C19-C20) | 0.289     | 81.96                    | 0.29            | 0.068                       |
|            |           | π*(C30-C29) | 0.453     | 63.26                    | 0.29            | 0.062                       |
| π(C28-C27) | 1.736     | π*(C19-C20) | 0.289     | 65.39                    | 0.27            | 0.061                       |
|            |           | π*(C21-C22) | 0.250     | 73.38                    | 0.27            | 0.065                       |
| LP ( 1) N1 | 1.916     | π*(C28-C27) | 0.254     | 67.48                    | 0.27            | 0.063                       |
|            |           | π*(C26-C25) | 0.241     | 60.96                    | 0.30            | 0.063                       |
| LP ( 2) O1 | 1.881     | π*(C23-C24) | 0.453     | 68.19                    | 0.28            | 0.064                       |
|            |           | π*(C26-C25) | 0.241     | 65.64                    | 0.29            | 0.063                       |
| LP ( 1) N1 | 1.916     | π*(C23-C24) | 0.453     | 71.37                    | 0.28            | 0.064                       |
|            |           | π*(C28-C27) | 0.254     | 75.85                    | 0.29            | 0.065                       |
| LP ( 2) O1 | 1.881     | σ*(C7-C8)   | 0.033     | 42.59                    | 0.89            | 0.086                       |
|            |           | σ*(C9-C10)  | 0.040     | 45.39                    | 0.89            | 0.089                       |
| LP ( 2) O1 | 1.881     | σ*(C11-C18) | 0.073     | 85.60                    | 0.66            | 0.105                       |
|            |           | σ*(C18-C19) | 0.062     | 77.11                    | 0.70            | 0.103                       |

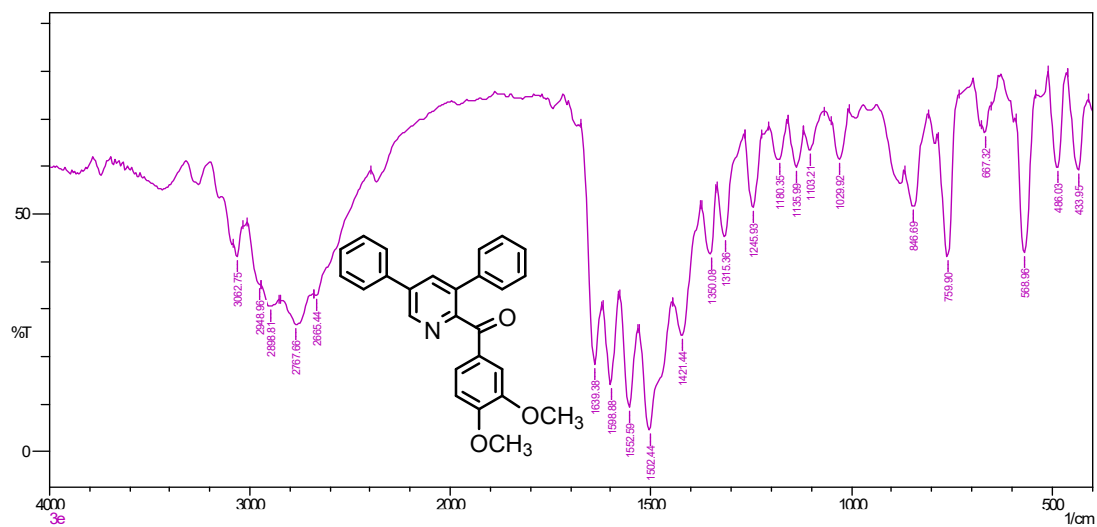

**Figure S1: FT-IR Spectrum of (3,4-dimethoxyphenyl)(3,5-diphenylpyridin-2-yl)methanone [MK1]**

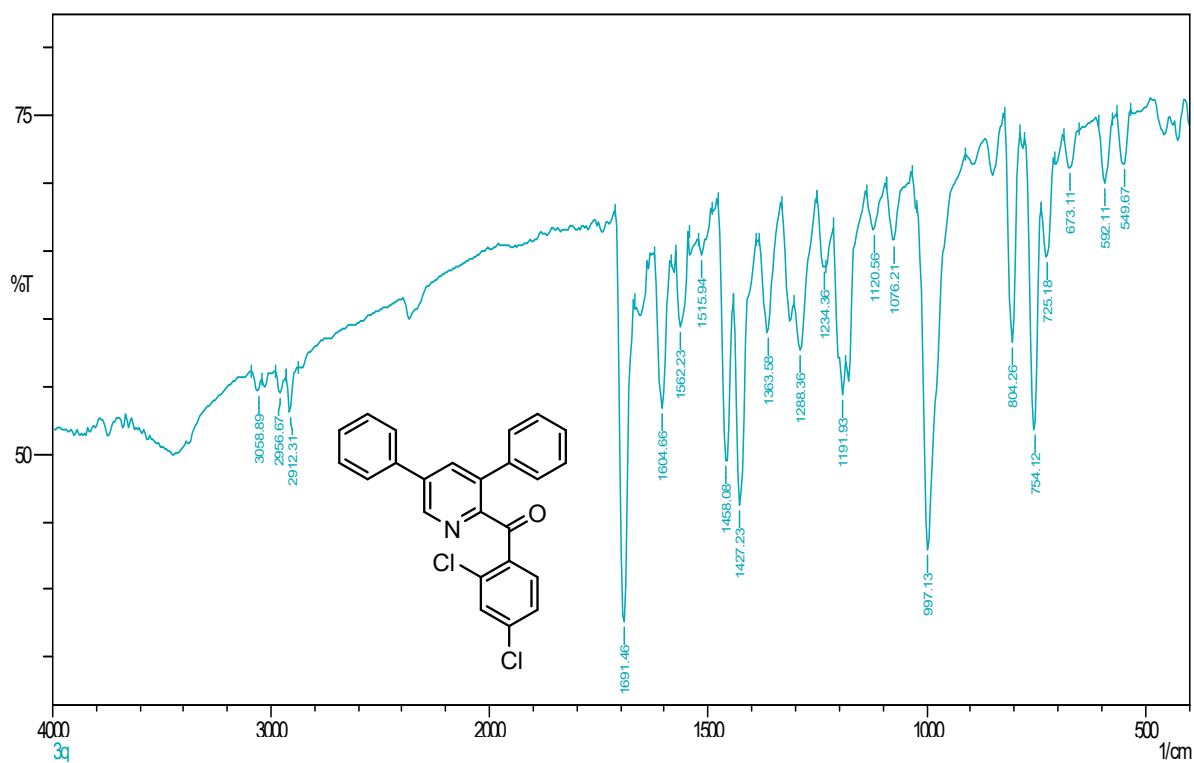

**Figure S2: FT-IR Spectrum of (2,4-dichlorophenyl)(3,5-diphenylpyridin-2-yl)methanone [MK2]**

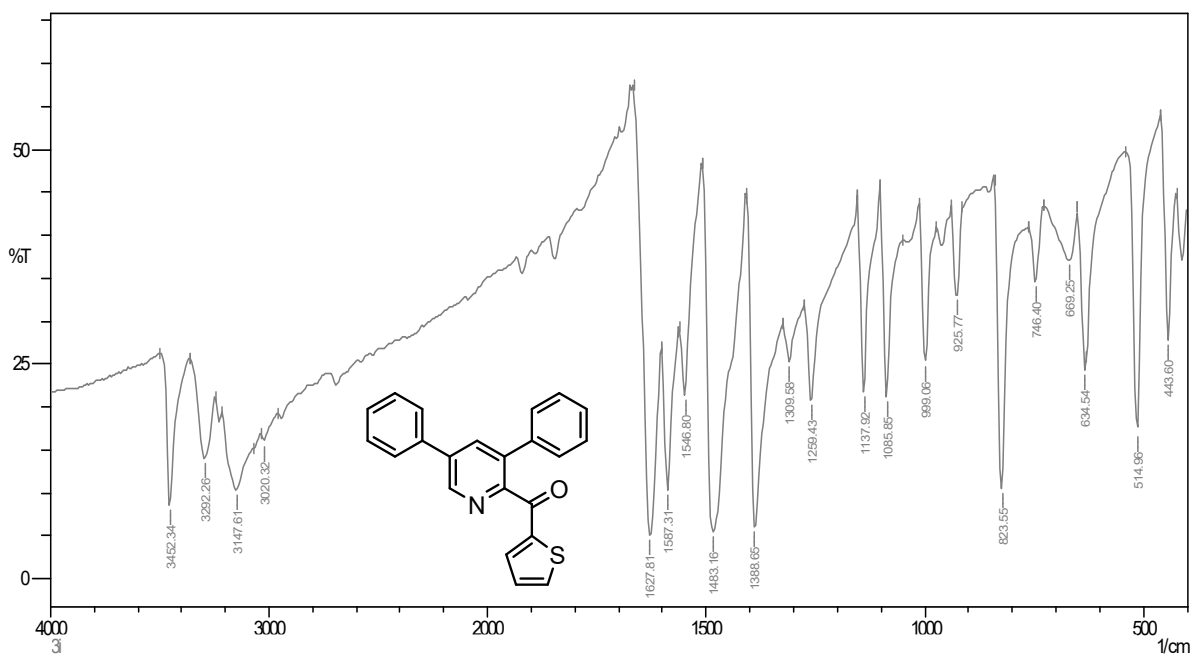

**Figure S3:** FT-IR Spectrum of (3,5-diphenylpyridin-2-yl)(thiophen-2-yl)methanone [MK3]

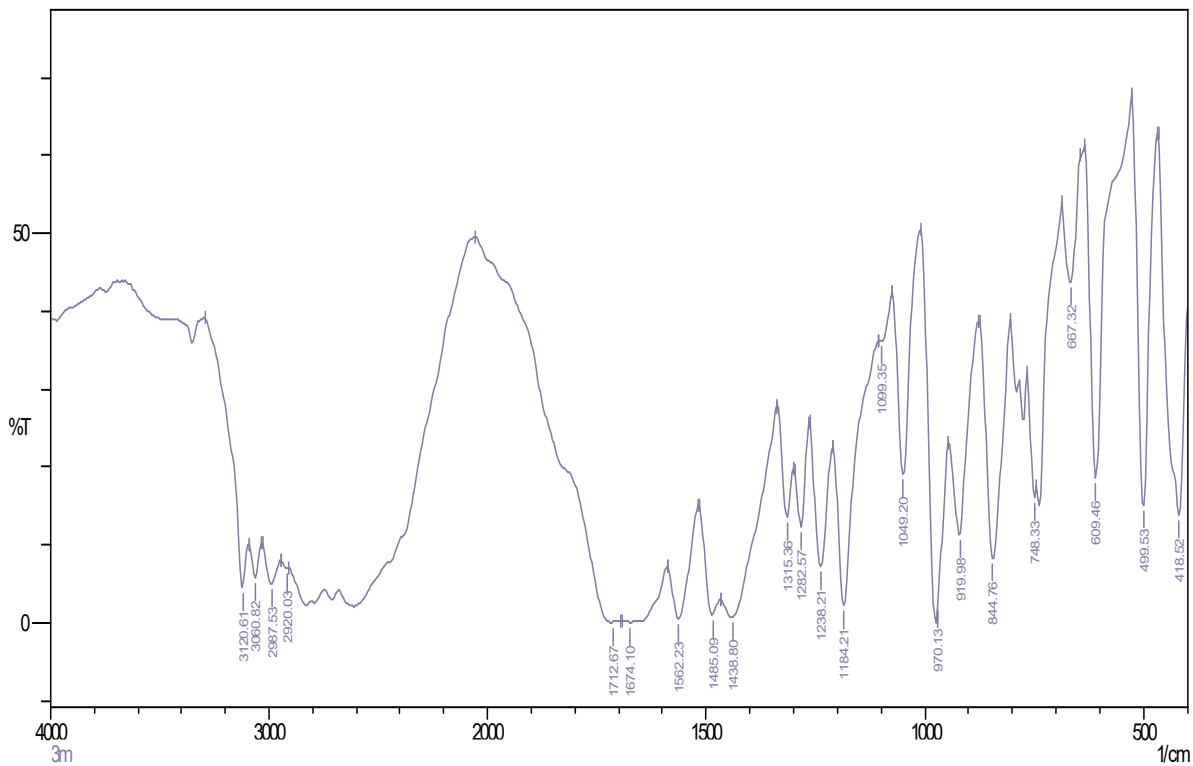

**Figure S4:** FT-IR Spectrum of (3,5-diphenylpyridin-2-yl)(naphthalen-1-yl)methanone [MK4]

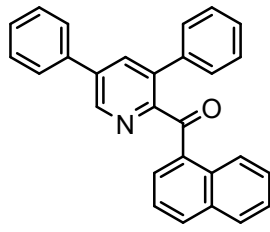

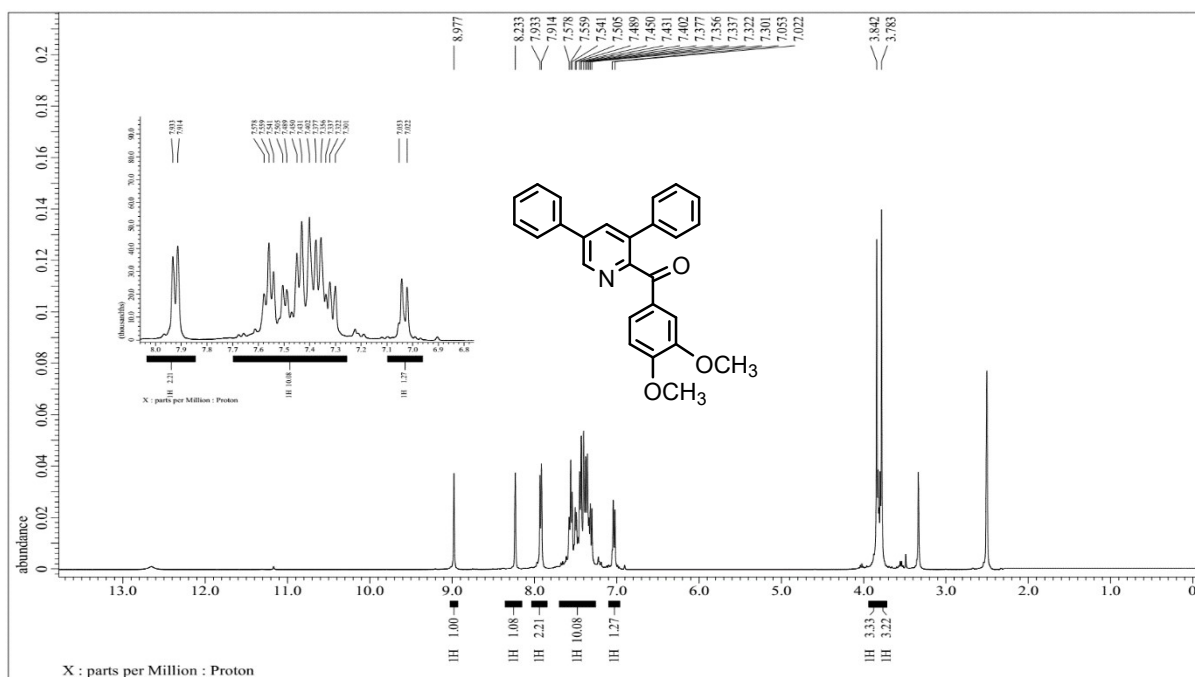

**Figure S5:** 400MHz  $^1\text{H}$ -NMR spectrum of (3,4-dimethoxyphenyl)(3,5-diphenylpyridin-2-yl)methanone [MK1]

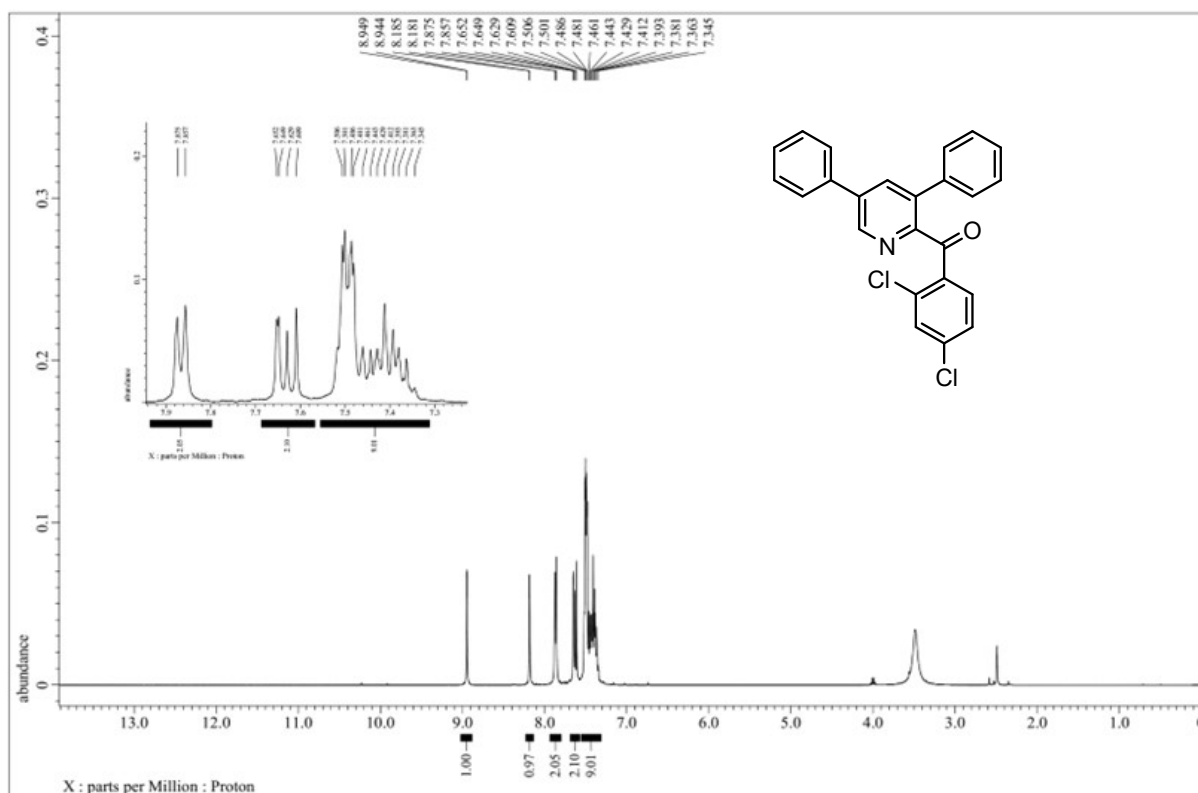

**Figure S6:** 400MHz  $^1\text{H}$ -NMR spectrum of (2,4-dichlorophenyl)(3,5-diphenylpyridin-2-yl)methanone [MK2]

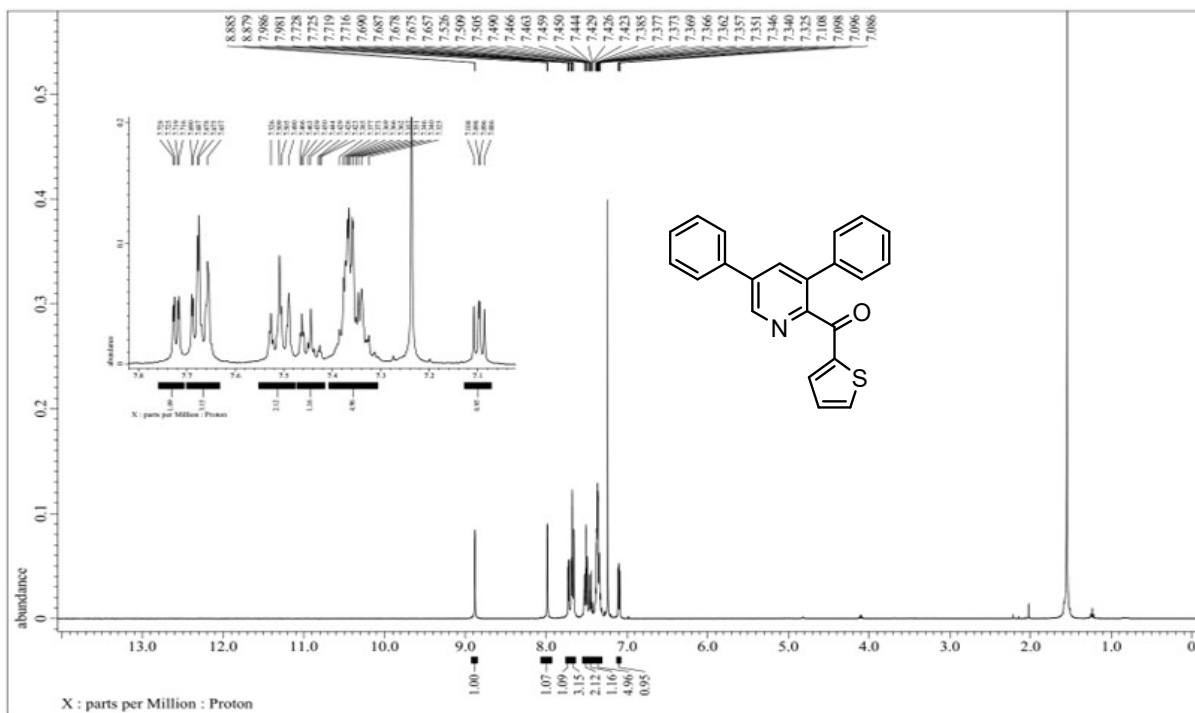

**Figure S7:** 400MHz <sup>1</sup>H-NMR spectrum of (3,5-diphenylpyridin-2-yl)(thiophen-2-yl)methanone [MK3]



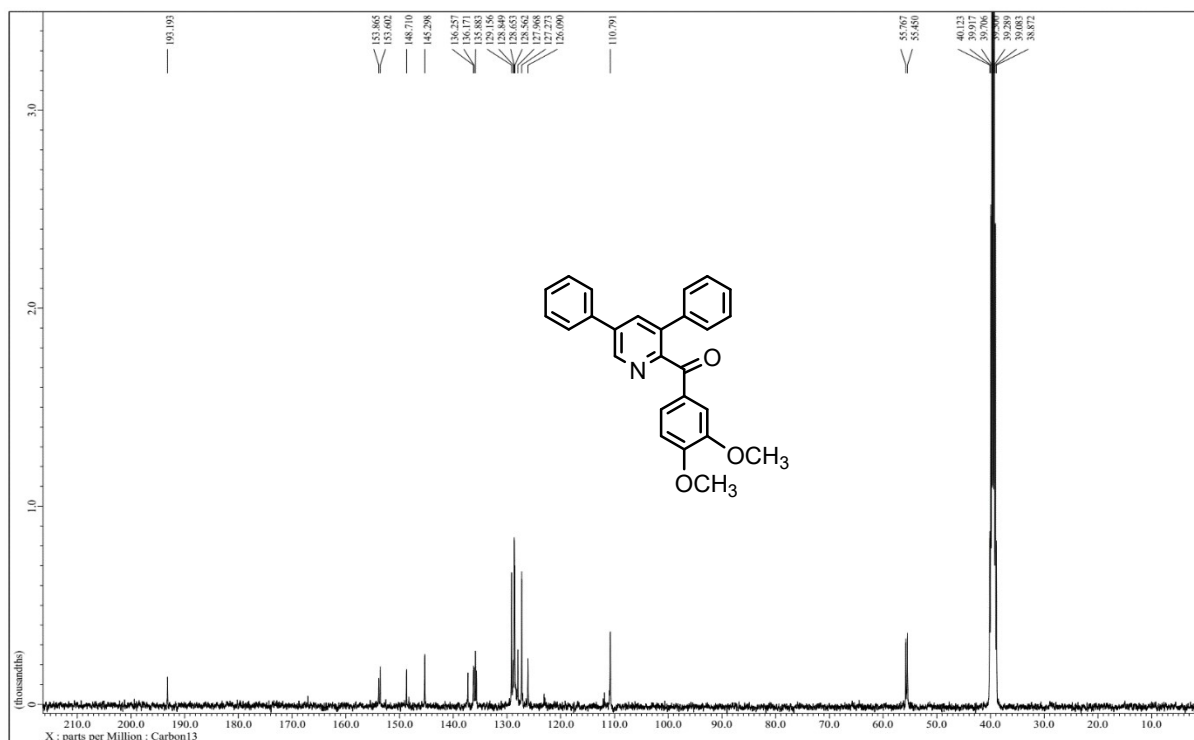

**Figure S9:** 101MHz <sup>13</sup>C-NMR spectrum of (3,4-dimethoxyphenyl)(3,5-diphenylpyridin-2-yl)methanone [MK1]

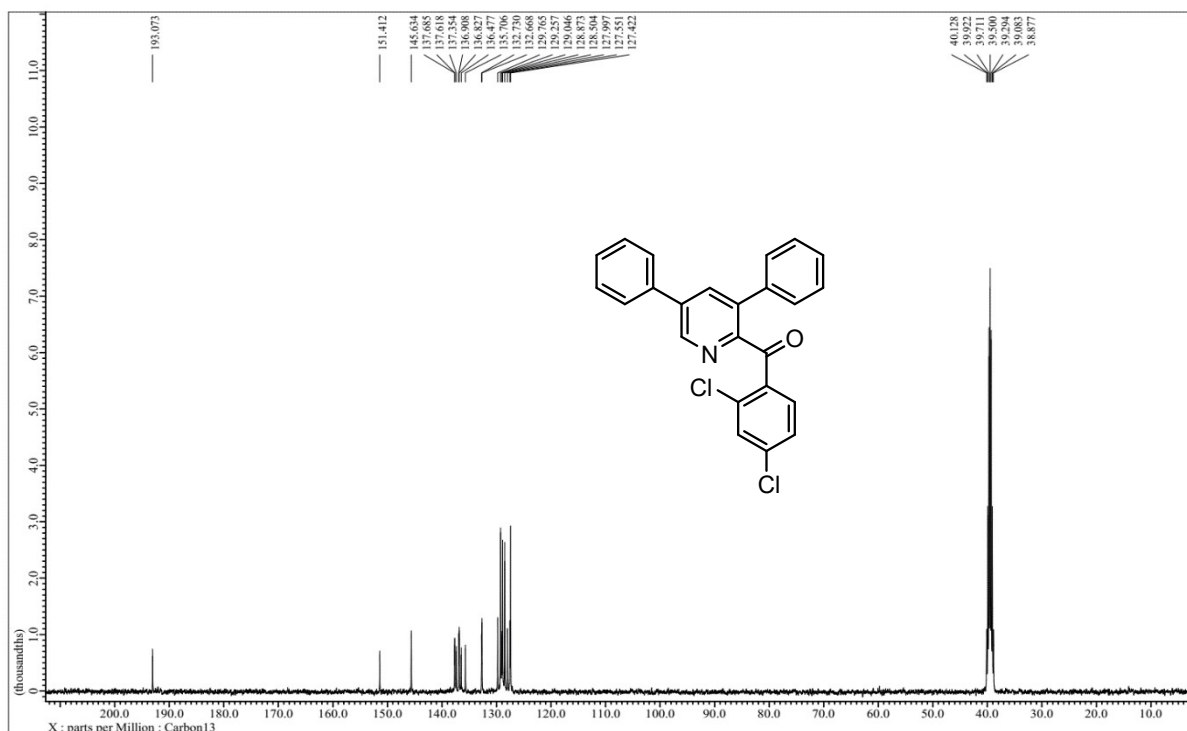

**Figure S10:** 101MHz <sup>13</sup>C-NMR spectrum of (2,4-dichlorophenyl)(3,5-diphenylpyridin-2-yl)methanone [MK2]

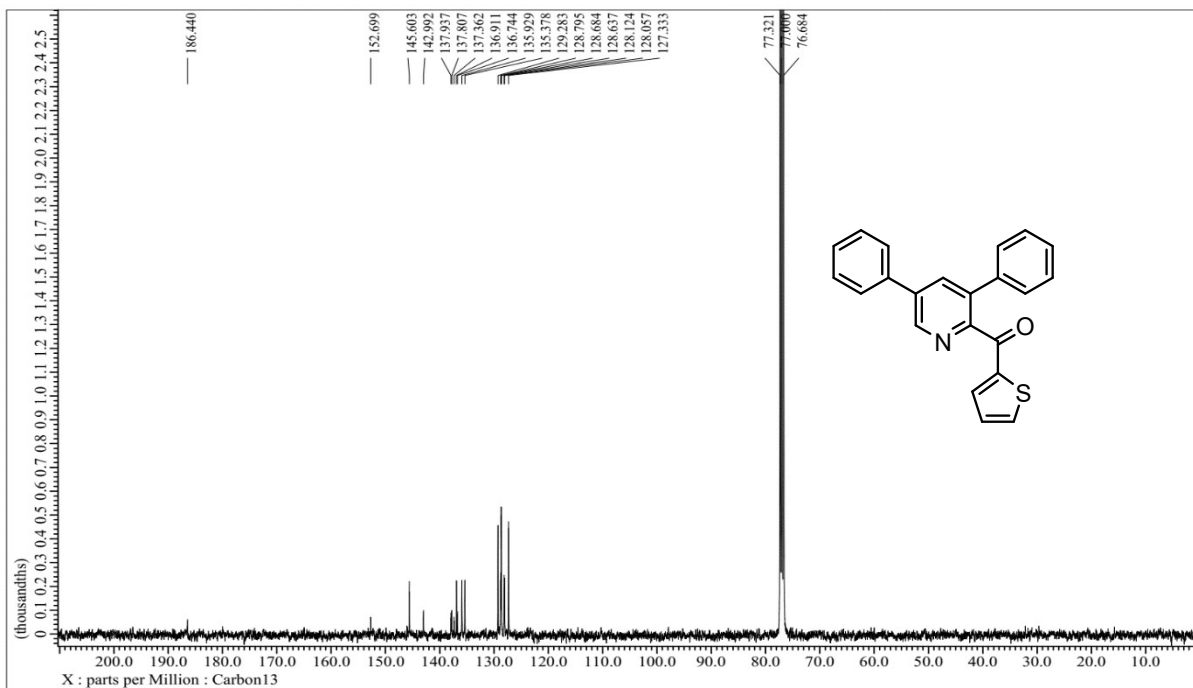

**Figure S11:** 101MHz  $^{13}\text{C}$ -NMR spectrum of (3,5-diphenylpyridin-2-yl)(thiophen-2-yl)methanone [MK3]

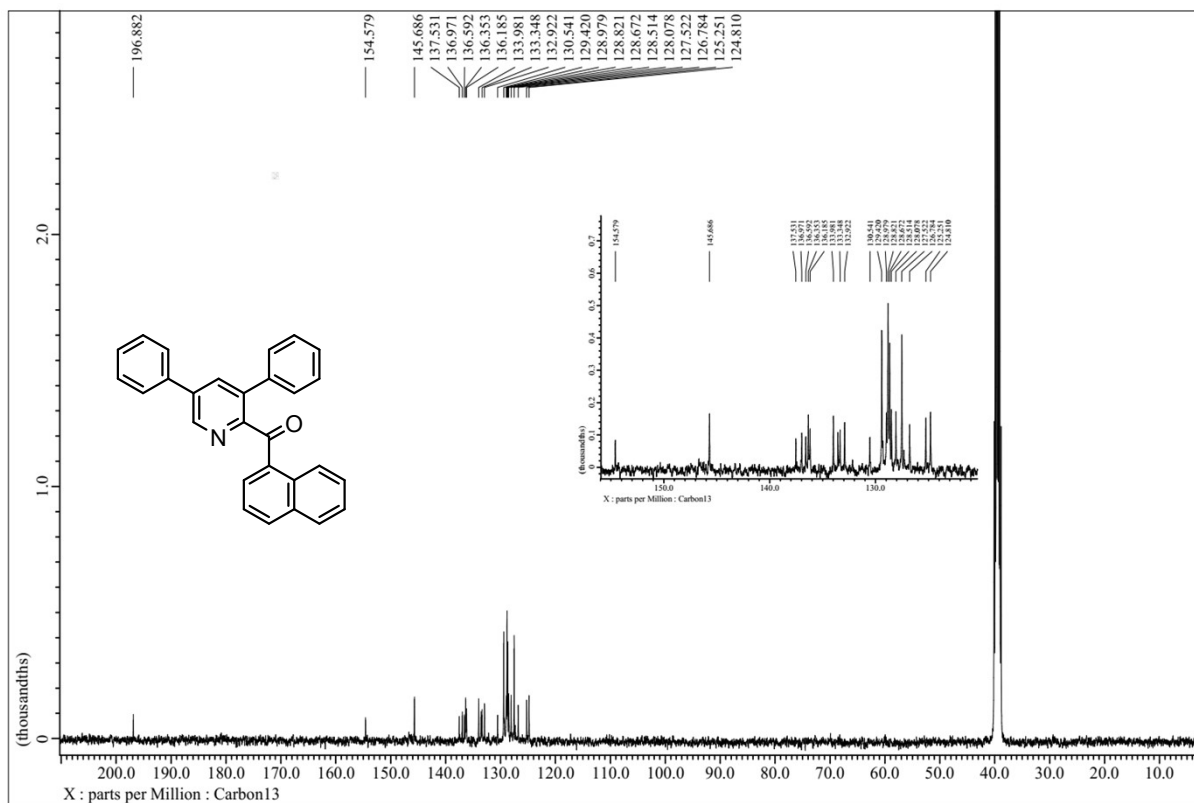

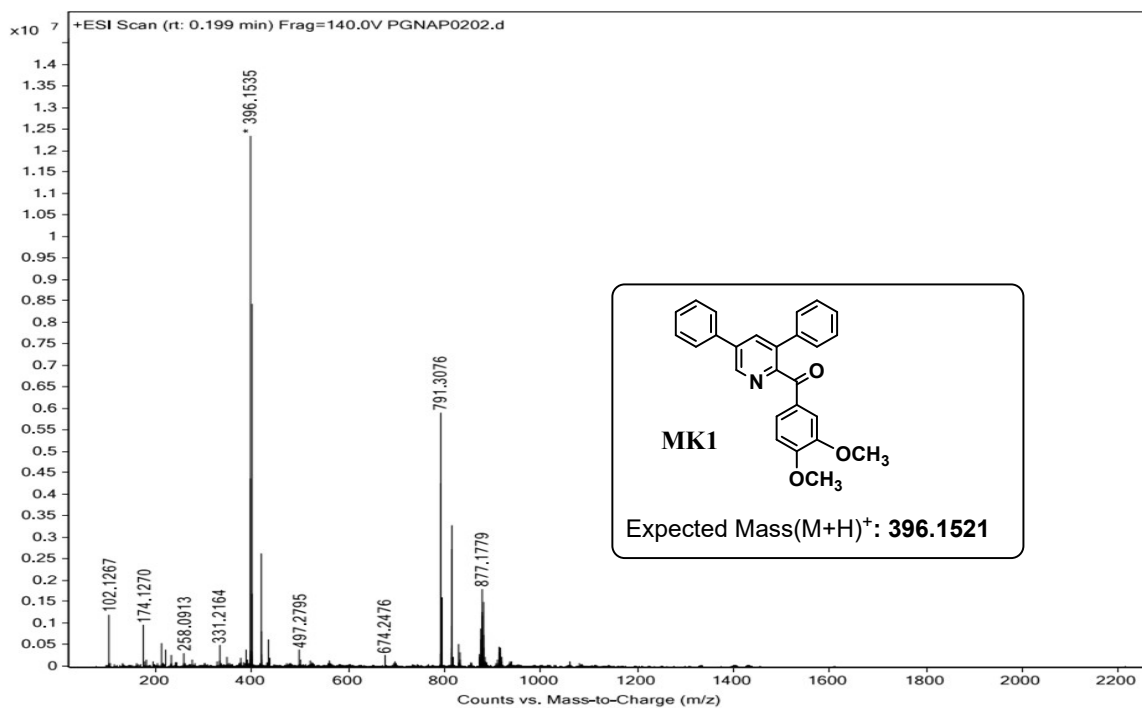

**Figure S13:** HRMS spectrum of (3,4-dimethoxyphenyl)(3,5-diphenylpyridin-2-yl)methanone [MK1]

## Analysis Report

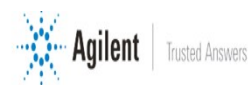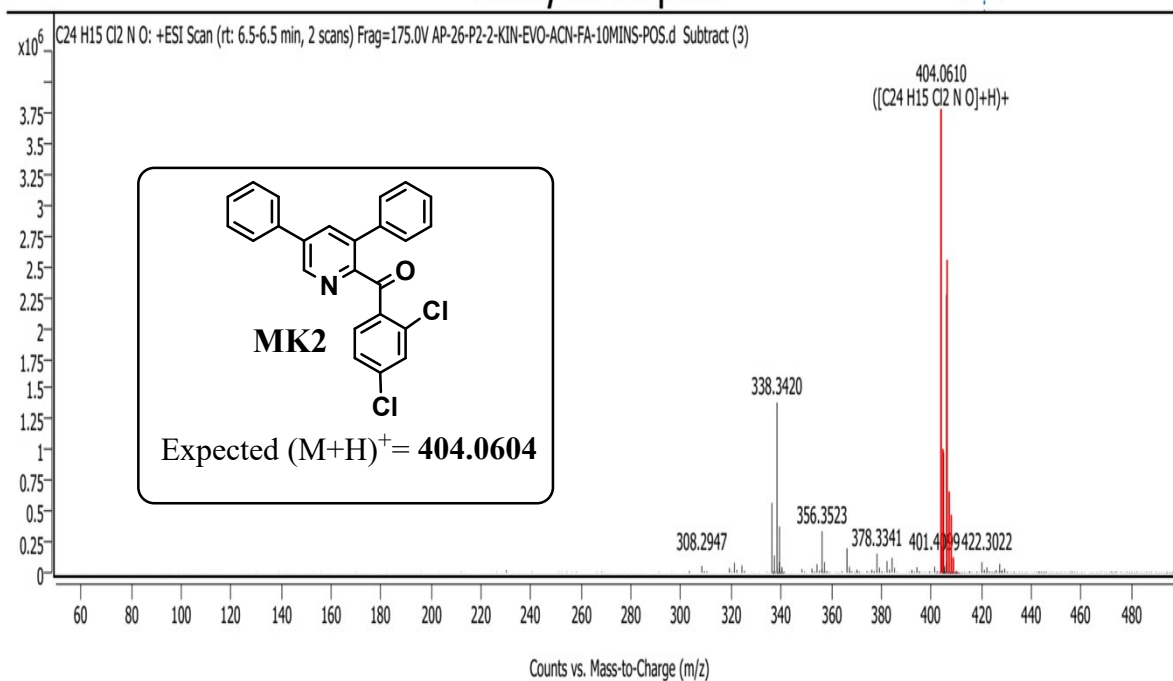

**Figure S14:** HRMS spectrum of (2,4-dichlorophenyl)(3,5-diphenylpyridin-2-yl)methanone [MK2]

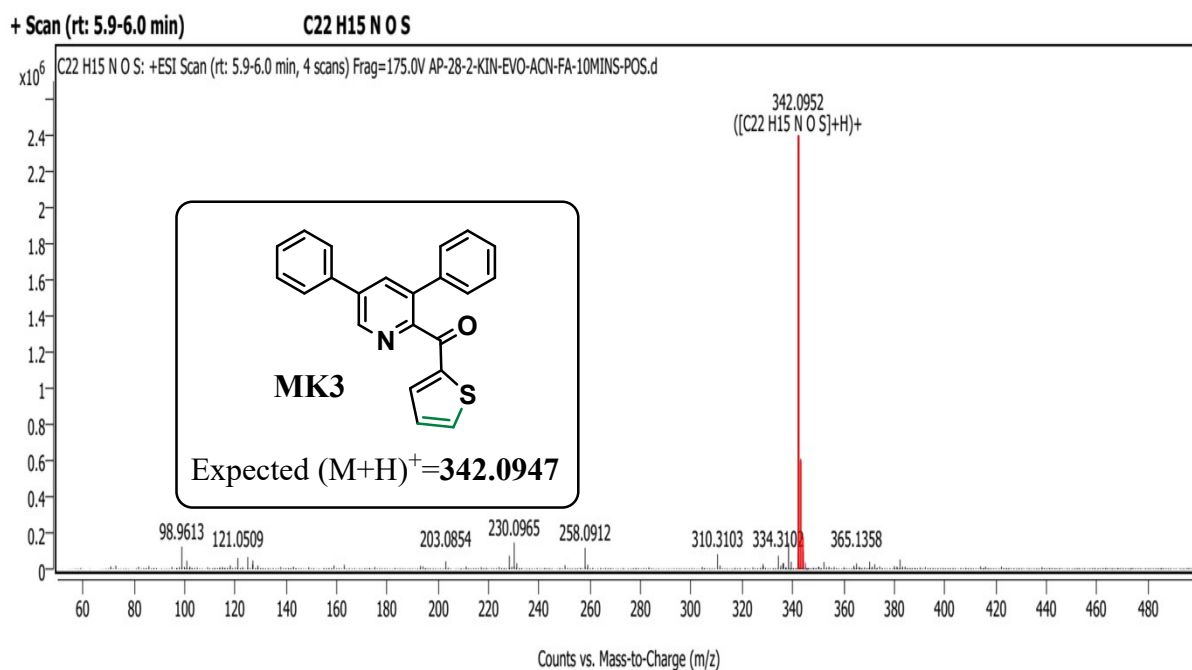

**Figure S15:** HRMS spectrum of (3,5-diphenylpyridin-2-yl)(thiophen-2-yl)methanone [MK3]

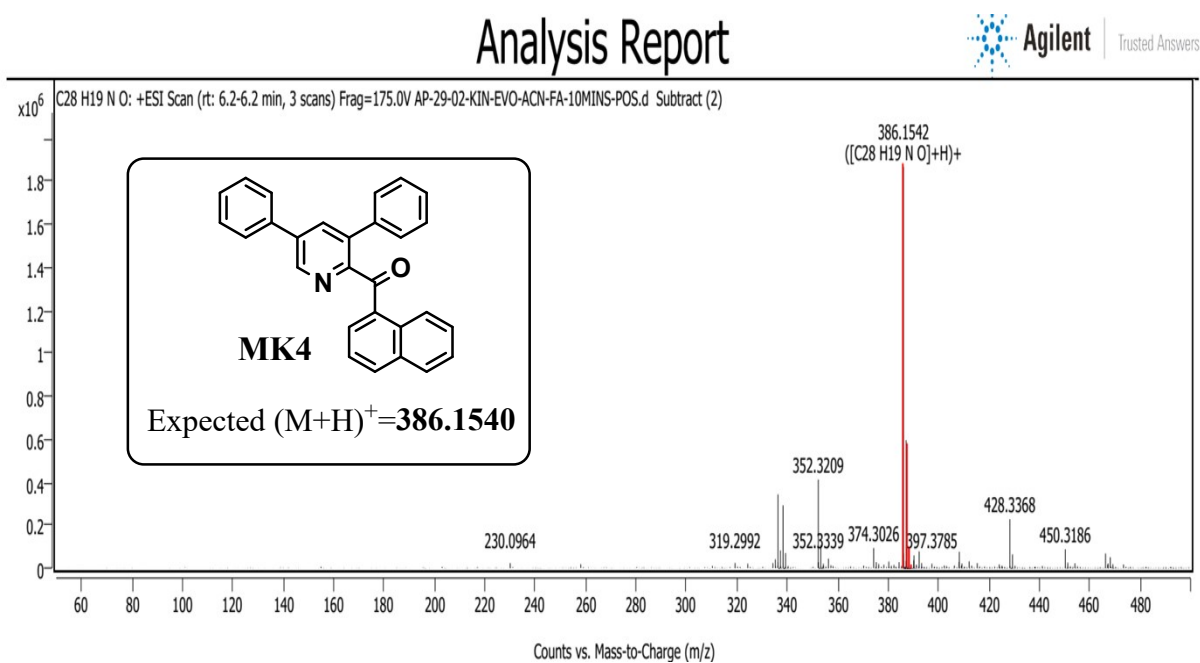

**Figure S16:** HRMS spectrum of (3,5-diphenylpyridin-2-yl)(naphthalen-1-yl)methanone [MK4]

MK1

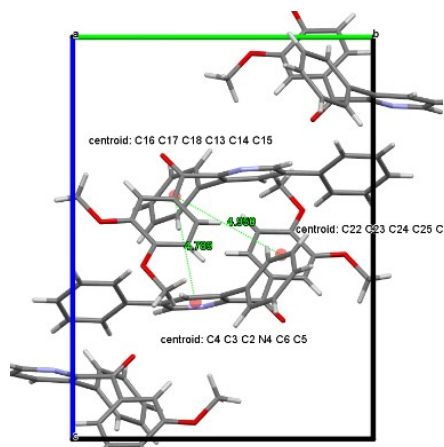

MK2

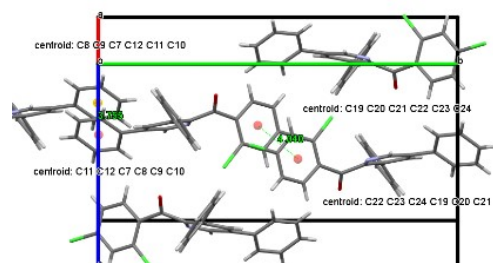

MK3

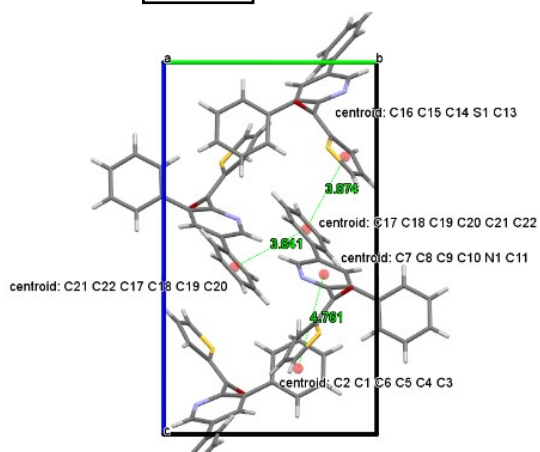

MK4

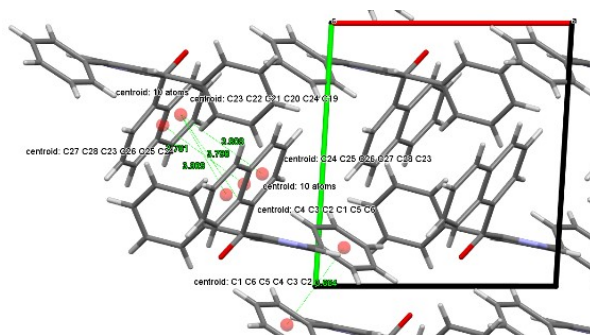

**Figure S17:** Three dimensional crystal packing interactions revealing prominent Cg-Cg intermolecular interactions (Green lines)

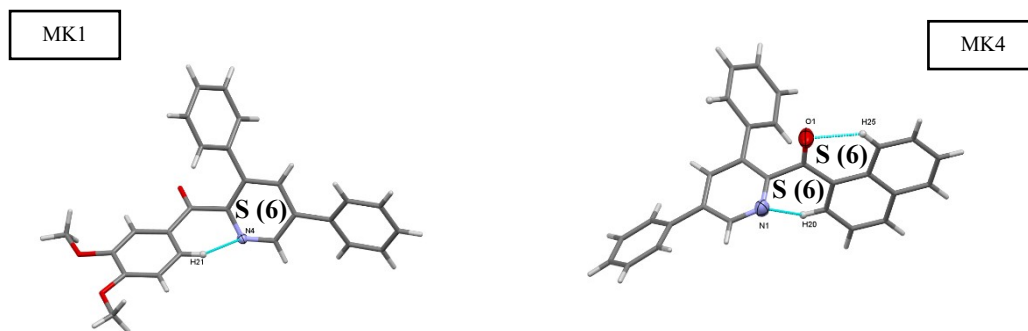

**Figure S18:** Formation of ring motifs through short contact interactions within the molecule

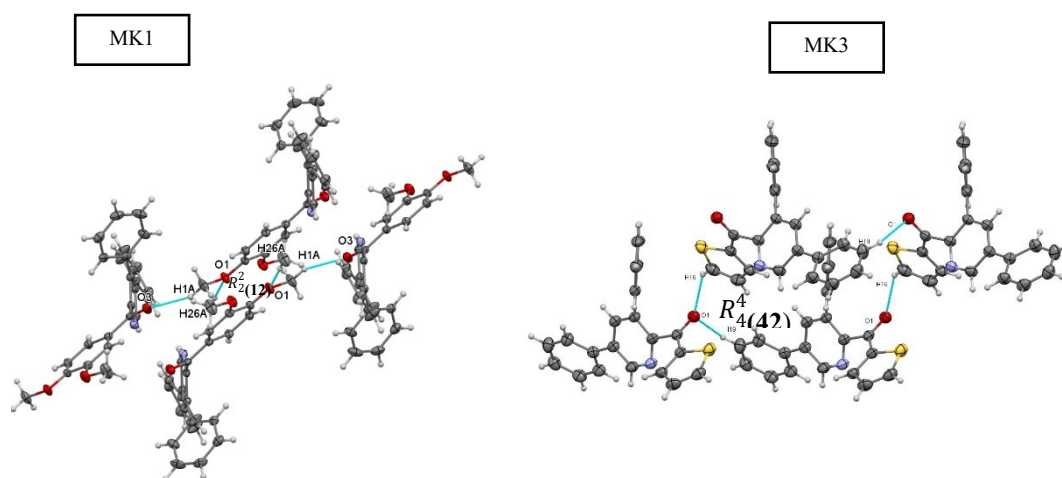

**Figure S19:** Formation of supramolecular synthon through intermolecular interactions within the molecule

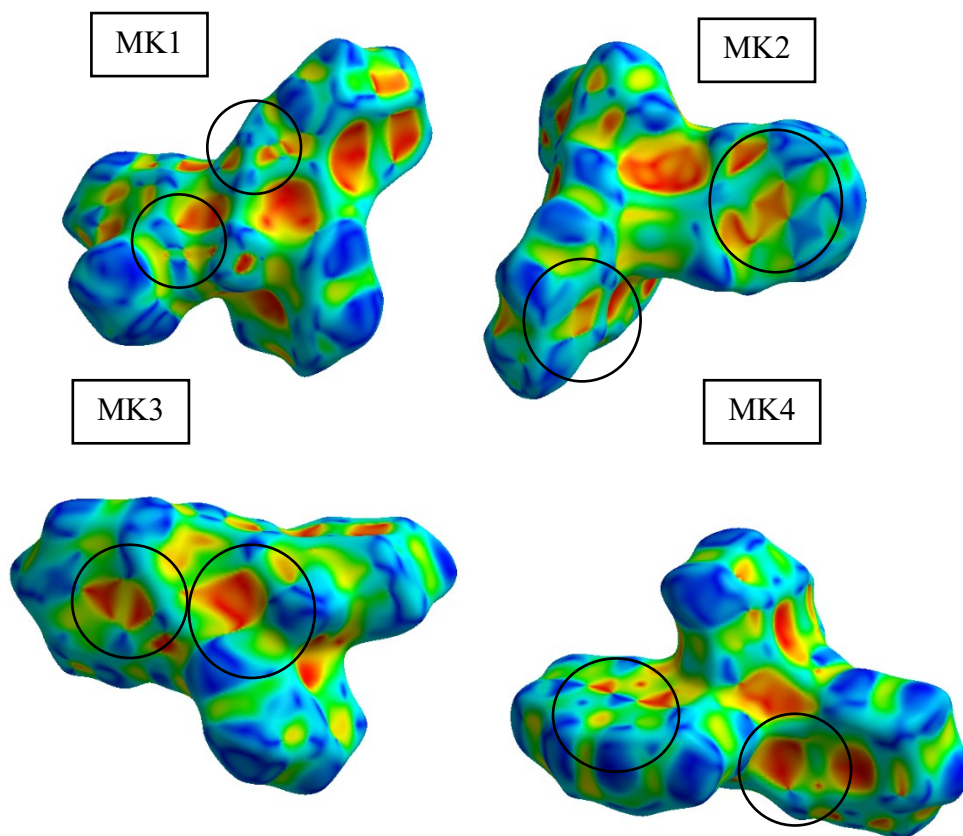

**Figure S20:** Shape index surface showing complementary red and blue triangular patches indicative of  $\pi \cdots \pi$  interactions (encircled in black)

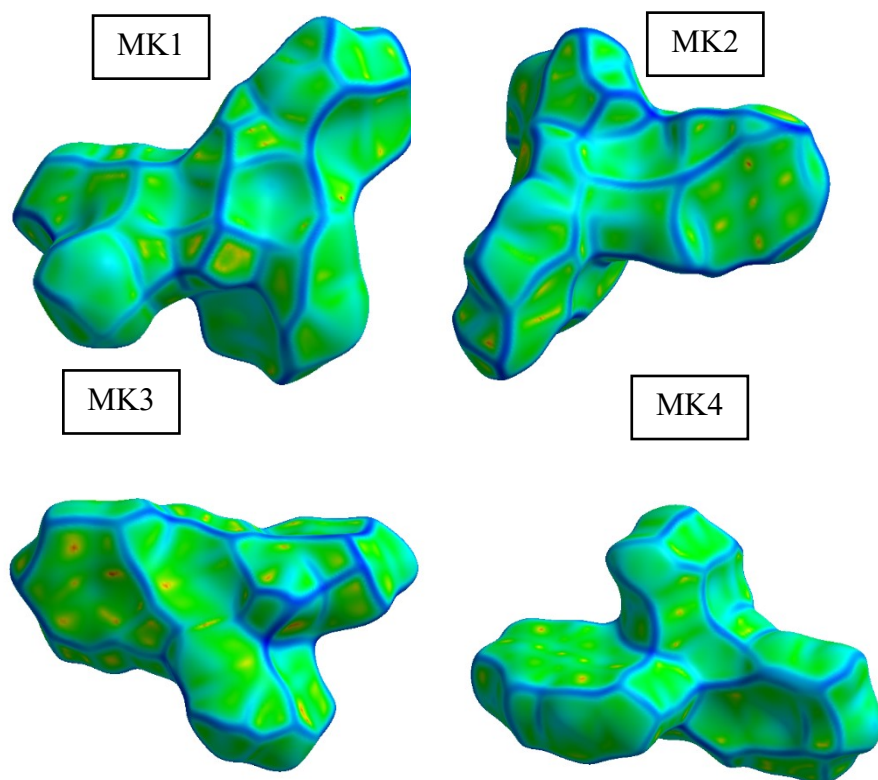

**Figure S21:** Curvedness surface map to delineate the planar stacking interactions within the crystal lattice.

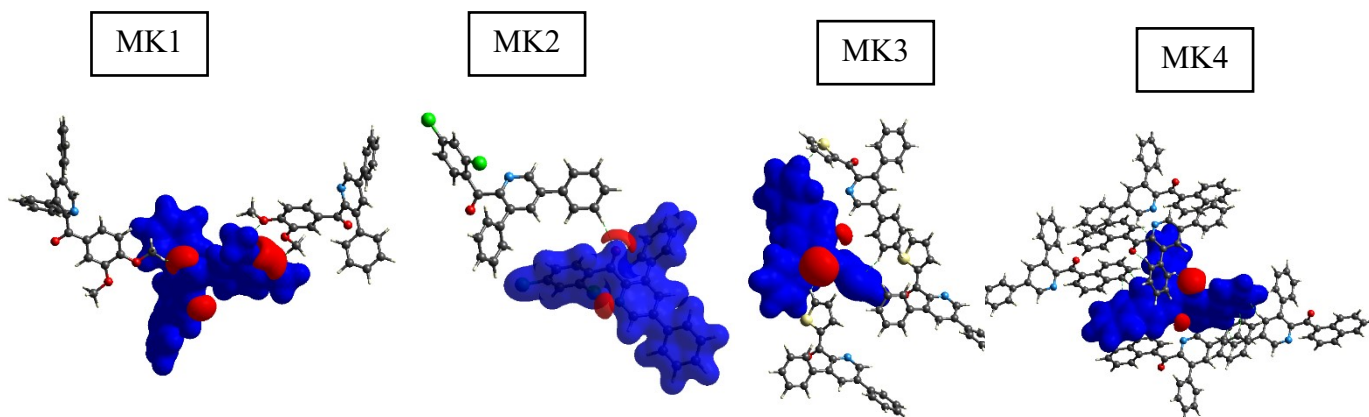

**Figure S22:** Electrostatic potential surface plot indicating nucleophile attack regions

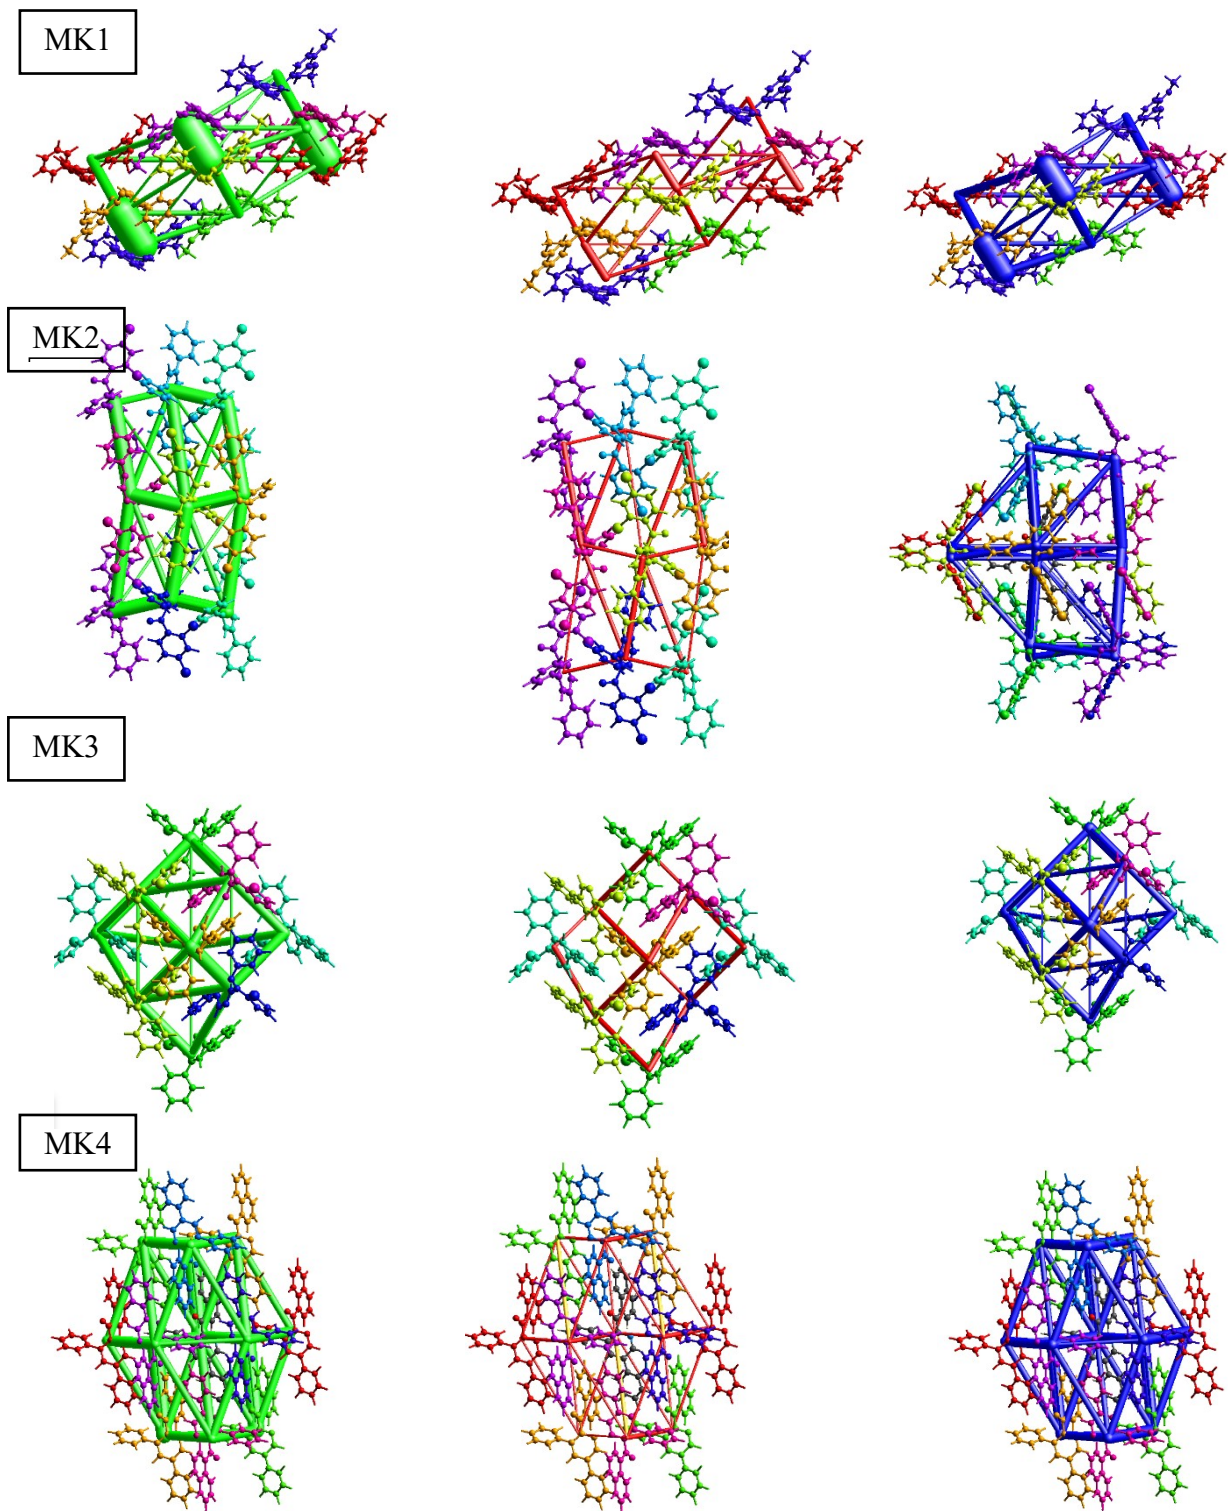

**Figure S23:** Molecular packing with energy framework of MK series of molecule representing to coulomb energy (red), dispersion energy (green), and total energy (blue) components with respect to unit cell axis respectively

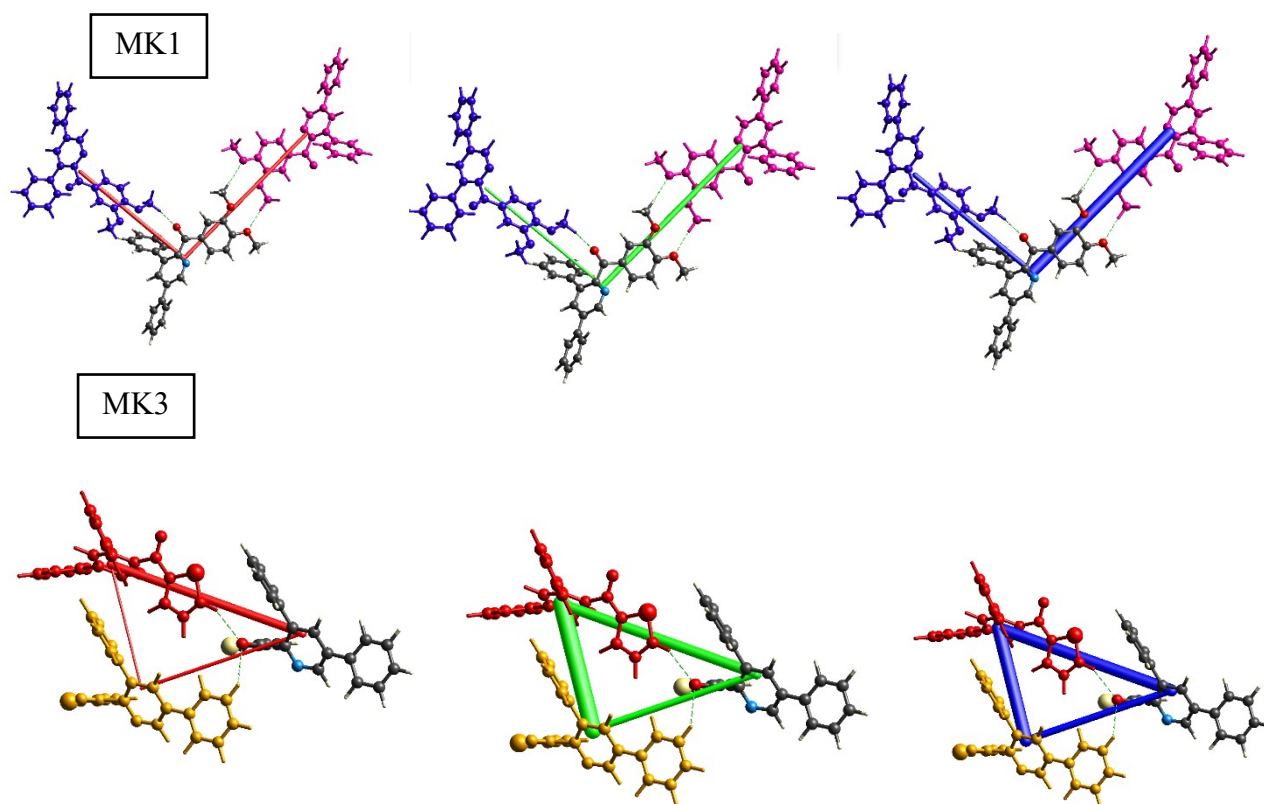

**Figure S24:** Energy framework diagrams for selected intermolecular molecular pairs involving C1–H1A···O3 and C26–H26A···O1 interactions in MK1, and C16–H16···O1 and C19–H19···O1 interactions in MK3, generated using energy framework analysis. The interaction energies are represented as cylindrical tubes having coulomb energy (red), dispersion energy (green), and total energy (blue) components with respect to unit cell axis respectively, respectively.

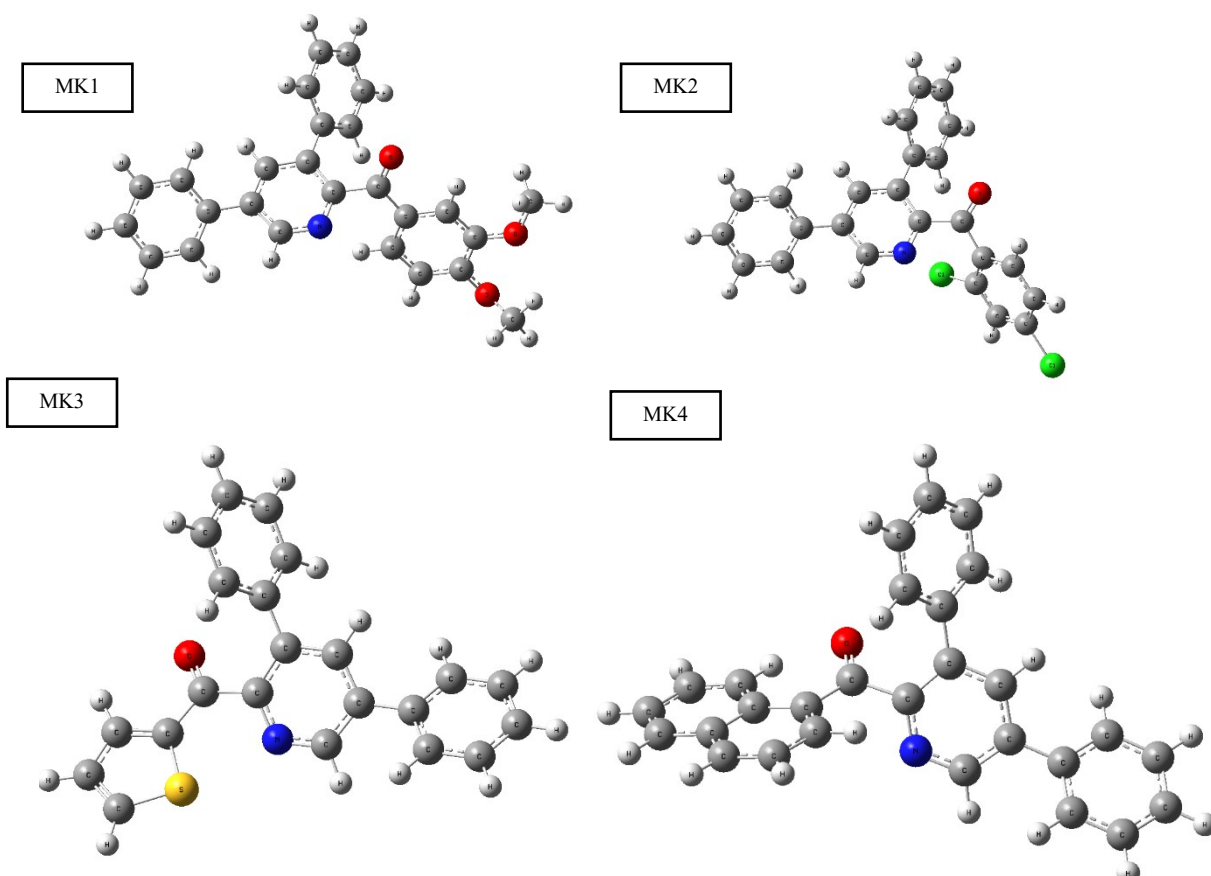

**Figure S25:** Three dimensional optimized geometries using B3LYP/6-311++G (d, p) level of theory

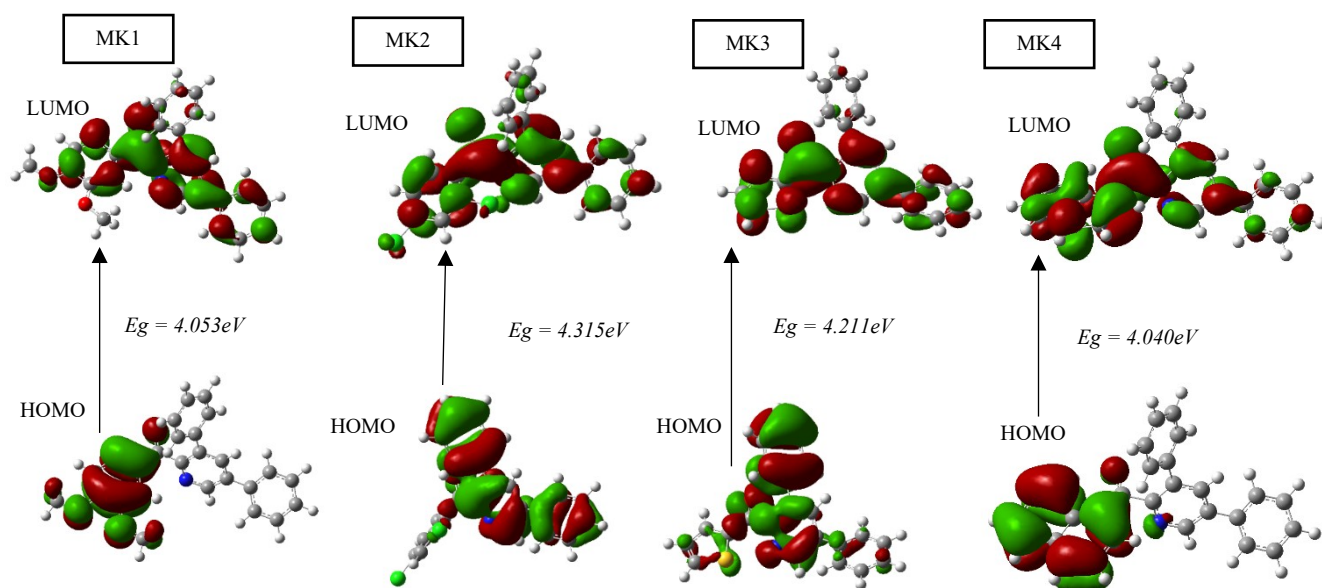

**Figure S26:** The frontier molecular orbital (FMO) plot of the optimized compounds

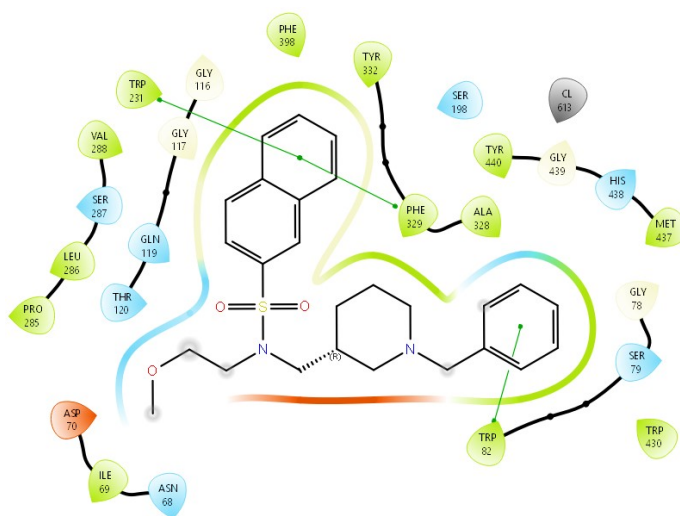

**Figure S27:** Two dimensional protein-co-crystal ligand (5HF) interaction plot interacting with neighboring amino acid residues of hBChE target

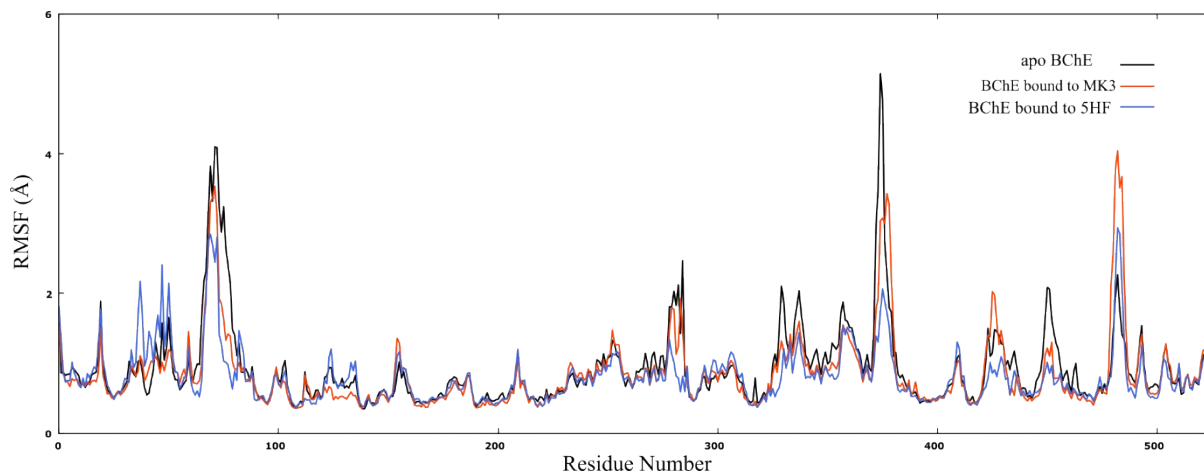

**Figure S28:** The RMSF plot shows residue-level flexibility across the hBChE structure in its apo form (black), MK3-bound complex (orange), and 5HF-bound complex (blue)

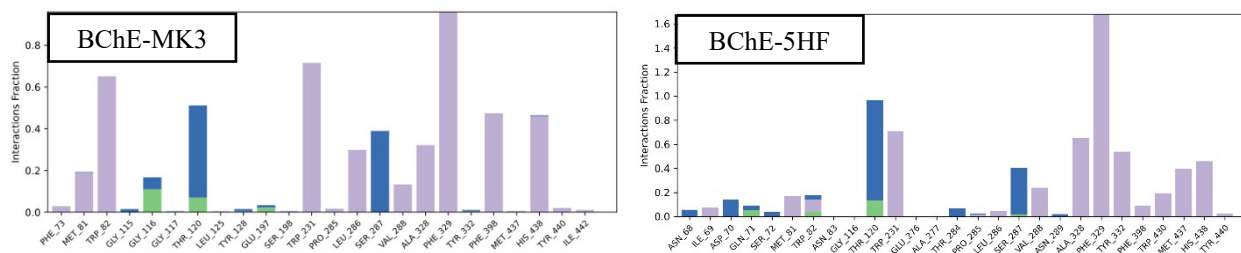

**Figure S29:** Protein-Ligand complex interaction profile highlights key residues involved in stabilising MK3 and 5HF relies predominantly on hydrophobic interactions along with a strong water-mediated bridge illustrating distinct binding mechanisms and stabilisation strategies for each ligand.

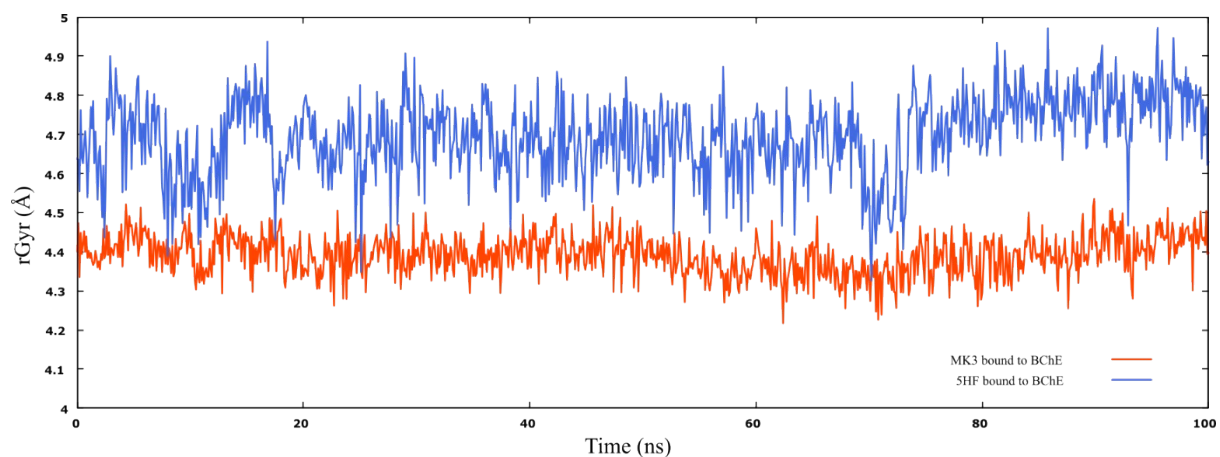

**Figure S30:** Radius of gyration (Rg) plots for MK3 (orange) and 5HF (blue) show their conformational rigidity during the simulation.

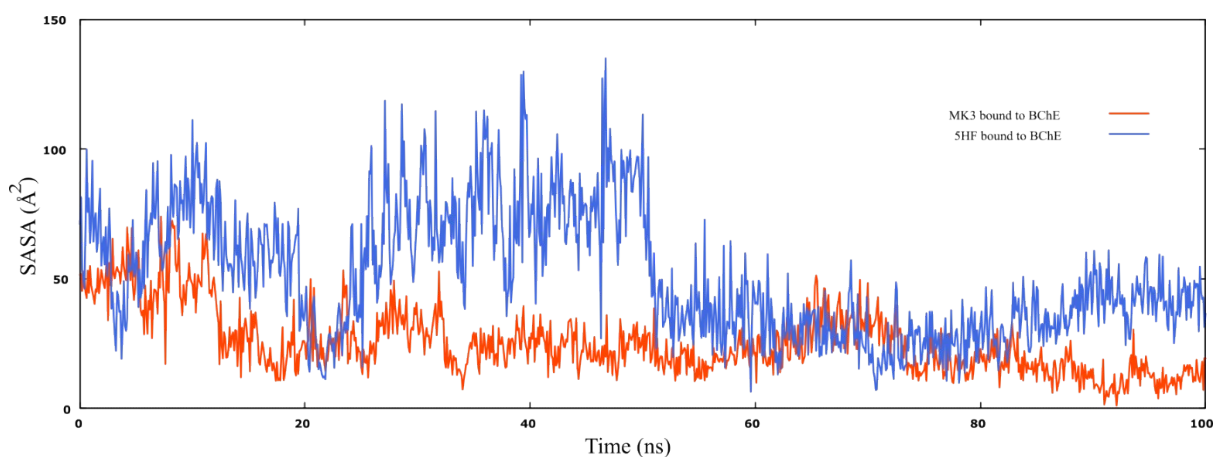

**Figure S31:** The SASA plots for MK3 and 5HF (co crystal ligand) revealing differences in solvent exposure over the simulation.

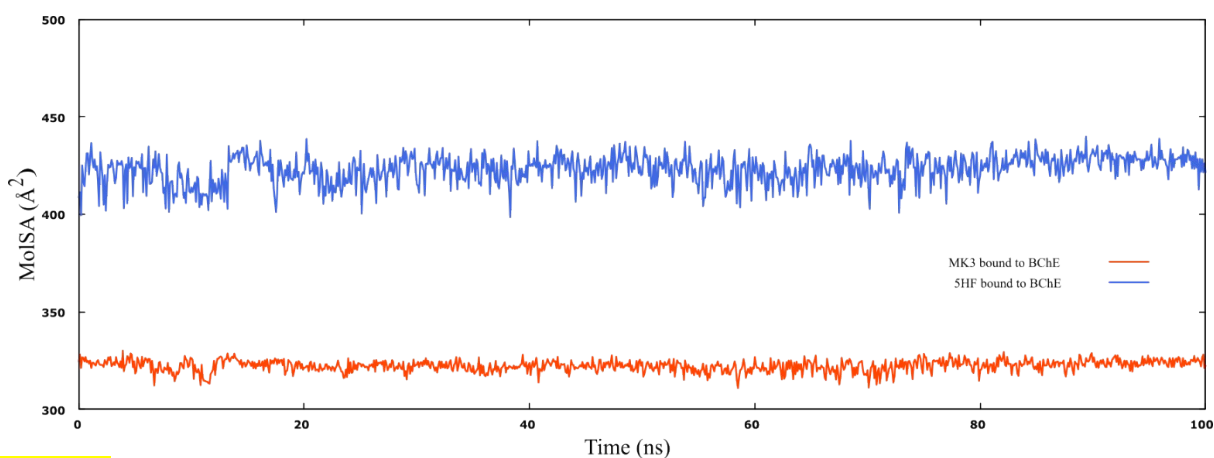

**Figure S32:** The Molecular Surface Area (MolSA) plots for MK3 and 5HF (co crystal ligand) revealing differences in total surface area of a molecule based on its van der Waals surface.
